# Supplementary material for: PLK1 Regulates MicroRNA Biogenesis through Drosha Phosphorylation
Source: MDPI journal article supplement (doi:10.3390/ijms241814290), 2023-09-19
Supplement: s1 [file s1]

| GSK461 vs DMSO   | log2FoldChange | padj     |
|------------------|----------------|----------|
| hsa-miR-1248     | -3.145         | 7.23E-07 |
| hsa-miR-511-5p   | 2.6332         | 1.46E-06 |
| hsa-miR-891a-5p  | 3.2571         | 1.46E-06 |
| hsa-miR-152-3p   | 1.5457         | 4.27E-06 |
| hsa-miR-1306-5p  | -1.8734        | 7.26E-05 |
| hsa-miR-509-3-5p | 2.0663         | 0.000198 |
| hsa-miR-892a     | 2.0309         | 0.017393 |
| hsa-miR-3688-3p  | 2.2838         | 0.021659 |
| hsa-miR-3688-5p  | 2.2838         | 0.021659 |
| hsa-miR-6716-3p  | 2.5435         | 0.021659 |
| hsa-miR-139-3p   | 2.3904         | 0.025937 |
| hsa-miR-93-3p    | -1.2808        | 0.025937 |
| hsa-miR-616-5p   | -2.4012        | 0.029932 |
| hsa-miR-483-5p   | 2.3626         | 0.031181 |
| hsa-miR-2277-5p  | -1.3697        | 0.034963 |
| hsa-miR-29c-5p   | -1.2142        | 0.039904 |

**Table S1: Mature MicroRNAs Regulated by PLK1 Inhibitor, GSK461364 in HEK293T Cells.** Padj = adjusted p value. Red = upregulated, blue = downregulated. Data relating to **Fig 1** are shown

| RO520 vs DMSO     | log2FoldChange | padj     |
|-------------------|----------------|----------|
| hsa-miR-511-5p    | 2.9589         | 1.11E-07 |
| hsa-miR-1306-5p   | -2.4572        | 2.65E-05 |
| hsa-miR-892a      | 2.8486         | 2.65E-05 |
| hsa-miR-891a-5p   | 2.9103         | 0.000264 |
| hsa-miR-152-3p    | 1.2413         | 0.00034  |
| hsa-miR-378a-5p   | -1.6829        | 0.000504 |
| hsa-miR-4286      | -2.5818        | 0.000504 |
| hsa-miR-578       | 1.6541         | 0.001986 |
| hsa-miR-183-5p    | 1.0586         | 0.002164 |
| hsa-miR-509-3-5p  | 1.6569         | 0.002164 |
| hsa-miR-219a-1-3p | 1.7555         | 0.003948 |
| hsa-miR-4661-5p   | 2.0139         | 0.004562 |
| hsa-miR-99b-3p    | 1.5153         | 0.004872 |
| hsa-miR-1248      | -2.1529        | 0.005754 |
| hsa-miR-193b-3p   | -1.7357        | 0.00676  |
| hsa-miR-212-5p    | 1.2614         | 0.006819 |
| hsa-miR-2277-5p   | -1.647         | 0.008204 |
| hsa-miR-1296-5p   | -1.8469        | 0.017606 |
| hsa-miR-181a-2-3p | 1.1131         | 0.017606 |
| hsa-miR-23b-3p    | -1.3383        | 0.017606 |
| hsa-miR-365a-3p   | -1.5879        | 0.017606 |
| hsa-miR-486-3p    | 1.3083         | 0.017606 |
| hsa-miR-500a-5p   | -2.0656        | 0.017606 |
| hsa-miR-1260b     | -1.8747        | 0.018634 |
| hsa-miR-30a-3p    | 1.2677         | 0.022904 |
| hsa-miR-486-5p    | 1.305          | 0.022904 |
| hsa-miR-331-3p    | -1.4461        | 0.026473 |
| hsa-miR-93-3p     | -1.309         | 0.026473 |
| hsa-miR-29c-5p    | -1.0419        | 0.032357 |
| hsa-miR-215-5p    | 1.626          | 0.03943  |
| hsa-miR-93-5p     | -1.6198        | 0.03943  |
| hsa-miR-1288-3p   | 1.4389         | 0.048795 |
| hsa-miR-17-5p     | -1.7032        | 0.048795 |
| hsa-miR-221-5p    | -1.1293        | 0.048795 |
| hsa-miR-98-5p     | -1.1388        | 0.048795 |
| hsa-miR-454-3p    | -1.7582        | 0.049784 |

**Table S2: Mature MicroRNAs Regulated by PLK1 Inhibitor, RO-5203280 in HEK293T Cells.** Padj = adjusted p value. Red = upregulated, blue = downregulated. Data relating to **Fig 1** are shown

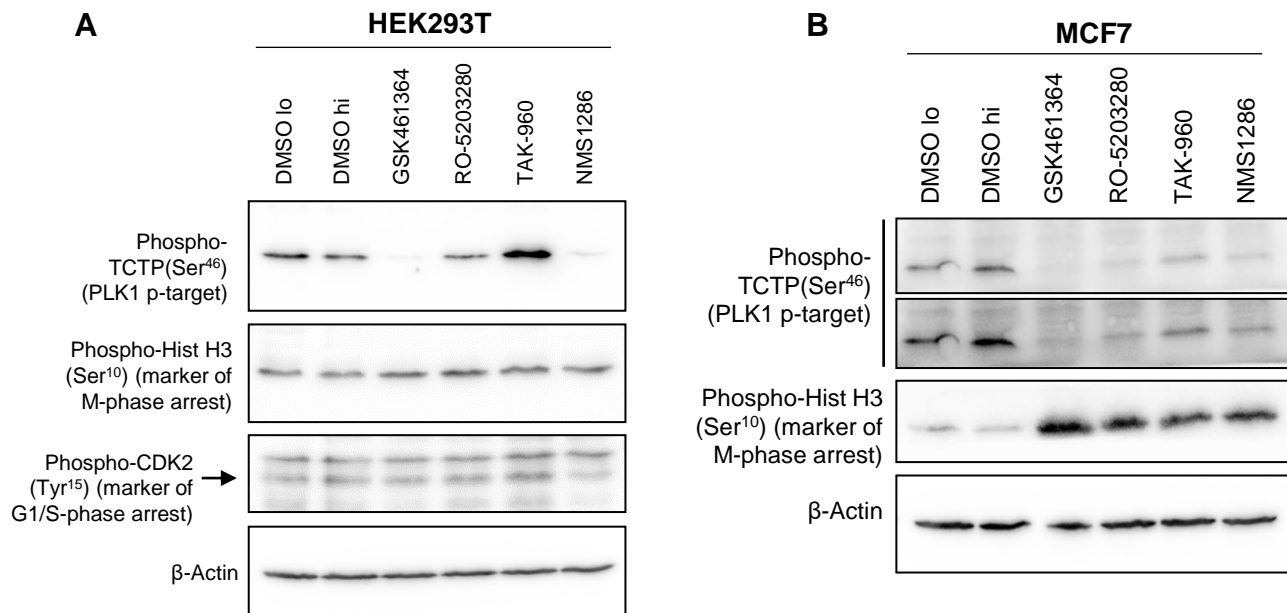

**Figure S1: Treatment of HEK293T and MCF7 Cells with PLK1 Inhibitors Decreases Phosphorylation of PLK1 Target, TCTP, and Increases Phosphorylation of Histone H3 – a Marker of M-Phase Arrest.** A,B) Western blot analysis of phospho-TCTP(Ser<sup>46</sup>), phospho-Histone H3(Ser<sup>10</sup>) and phospho-CDK2(Tyr<sup>15</sup>) protein levels in (A) HEK293T and (B) MCF7 cells treated with DMSO, GSK461364 (100nM), RO-5203280 (100nM), TAK-960 (100nM) or NMS1286 (500nM) for 24h. β-actin was used as control for loading. N=1. Data relating to **Fig 1** are shown.

Annotation of Total reads  
(A\_DMSO)

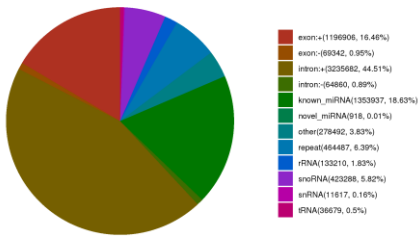

Annotation of Total reads  
(A\_GSK461)

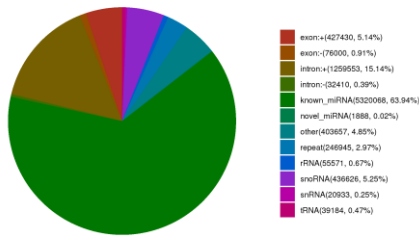

Annotation of Total reads  
(A\_RO520)

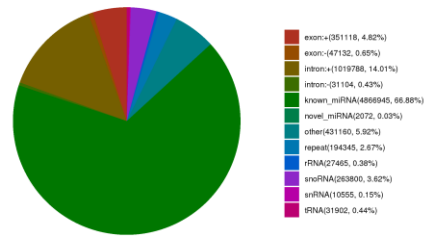

Annotation of Total reads  
(B\_DMSO)

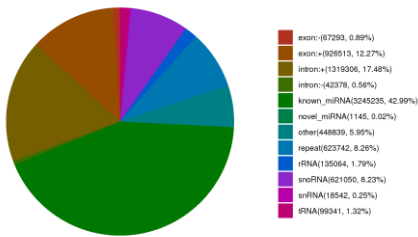

Annotation of Total reads  
(B\_GSK461)

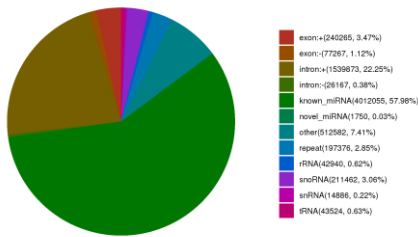

Annotation of Total reads  
(B\_RO520)

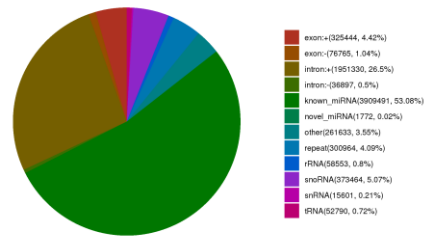

Annotation of Total reads  
(C\_DMSO)

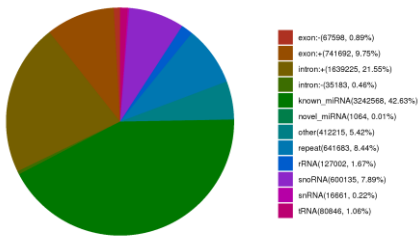

Annotation of Total reads  
(C\_GSK461)

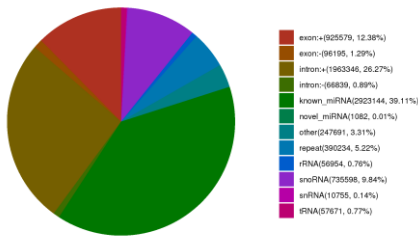

Annotation of Total reads  
(C\_RO520)

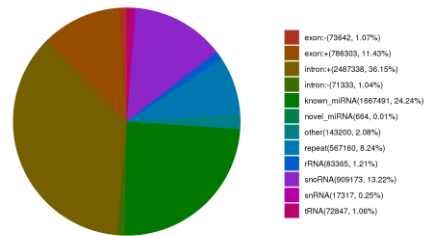

**Figure S2: Percentages of Reads Mapping to Different Small RNA Types Following RNA-Seq of HEK293T Cells Treated with PLK1 Inhibitors.** Pie charts show distribution of reads for different biological repeats (A, B and C), and in cells subject to treatment with DMSO, GSK461 and RO-520. Data relating to **Fig 1** are shown.

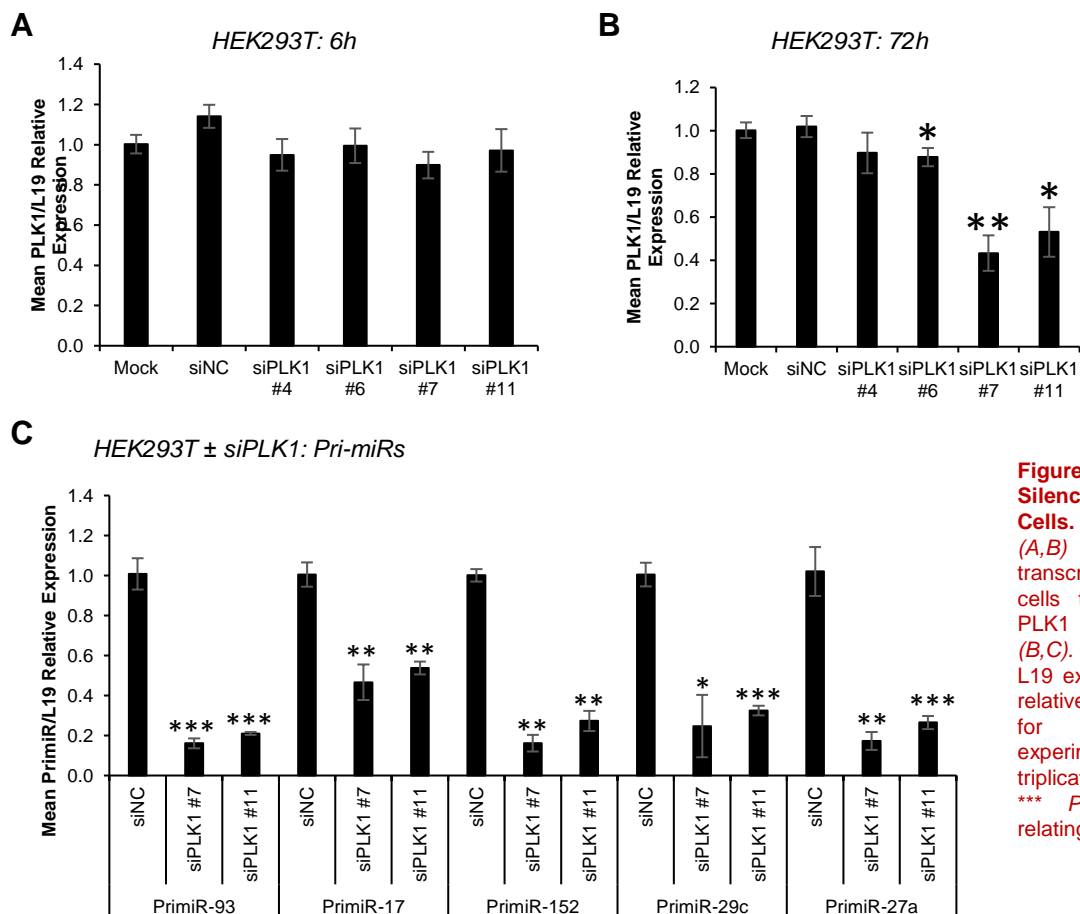

**Figure S3: siRNA-Mediated Silencing of PLK1 in HEK293T Cells.** A-C) qRT-PCR analysis of (A,B) PLK1 and (C) pri-miR transcript levels in HEK293T cells transfected with different PLK1 siRNAs for 6h (A) or 72h (B,C). Data are shown relative to L19 expression. Columns: mean relative PLK1 expression  $\pm$  SEM for three independent experiments performed in triplicate. \*  $P \leq 0.05$ , \*\*  $P \leq 0.005$ , \*\*\*  $P \leq 0.0001$  vs NC. Data relating to Fig 1 are shown.

A

## Reactome

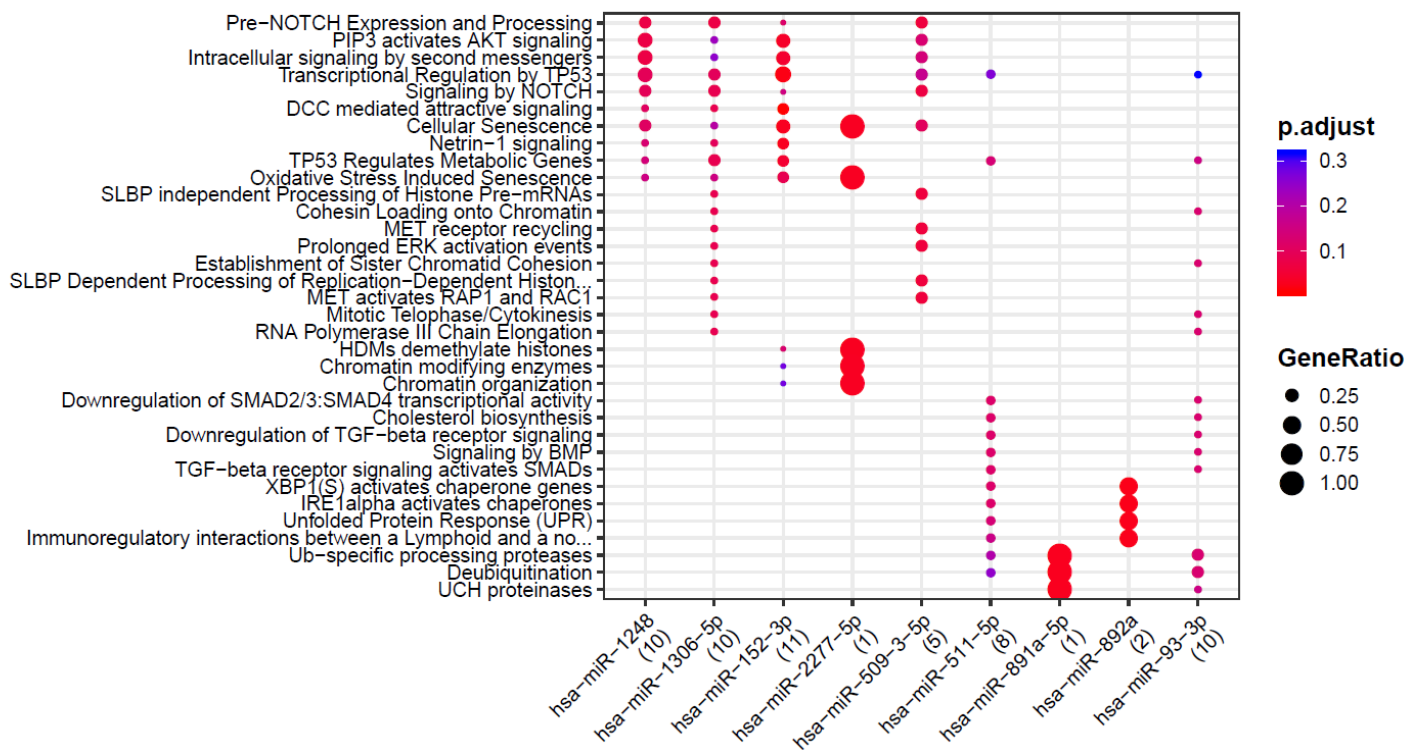

B

## WikiPathways

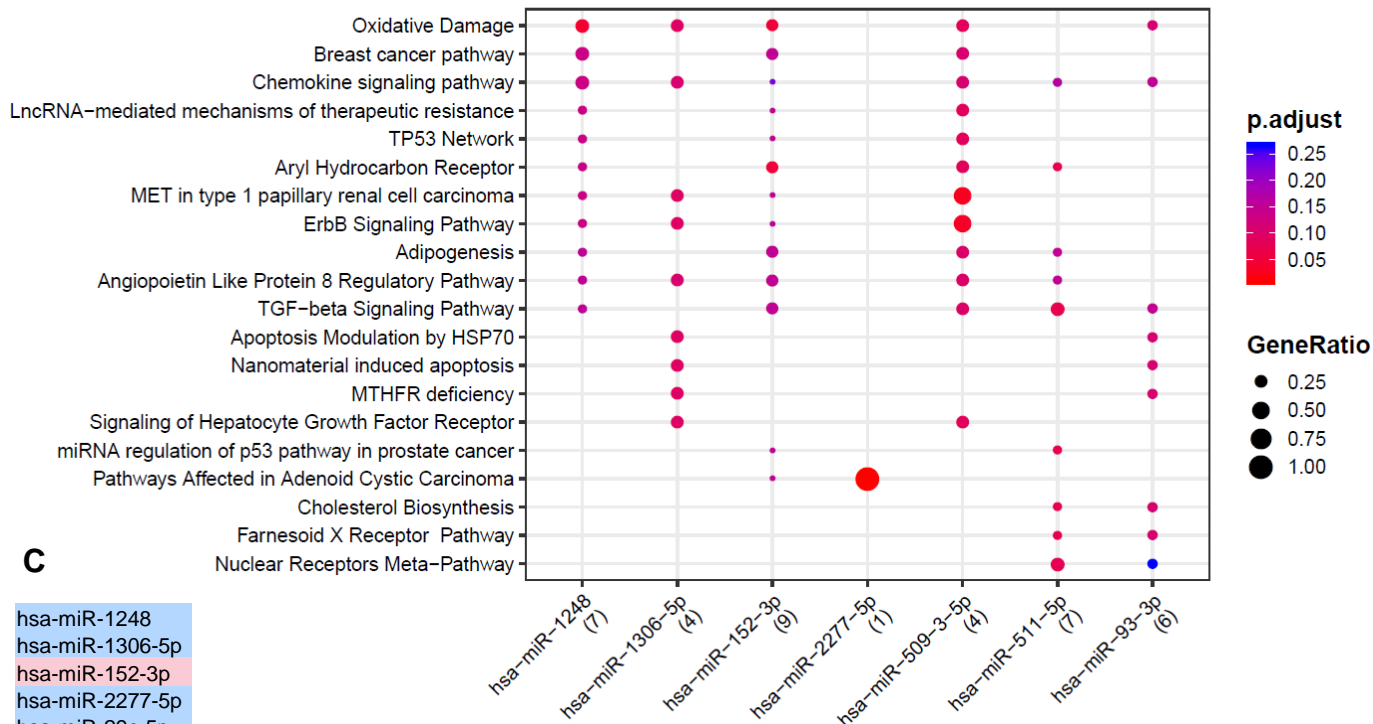

C

hsa-miR-1248  
 hsa-miR-1306-5p  
 hsa-miR-152-3p  
 hsa-miR-2277-5p  
 hsa-miR-29c-5p  
 hsa-miR-509-3-5p  
 hsa-miR-511-5p  
 hsa-miR-891a-5p  
 hsa-miR-892a  
 hsa-miR-93-3p

**Figure S4: Pathway Analysis - Shared RO-520- and GSK461-Regulated MicroRNAs.** Pathway analysis was conducted using the Mienturnet tool (<http://user.bio.uniroma1.it/apps/mienturnet/>) in combination with Reactome (A) and WikiPathways (B) pathway sets. Only microRNAs for which target information was available were included in the analysis. Shared GSK461- and RO-520-regulated miRs are shown (C). Data relating to **Fig 1** are shown.

|                                                        |             |                                          |             |                                  |             |                                                                         |             |                                |             |                                          |             |
|--------------------------------------------------------|-------------|------------------------------------------|-------------|----------------------------------|-------------|-------------------------------------------------------------------------|-------------|--------------------------------|-------------|------------------------------------------|-------------|
| <b>Adenocortical carcinoma</b>                         |             | <b>Bladder urothelial carcinoma</b>      |             | <b>Breast invasive carcinoma</b> |             | <b>Cervical squamous cell carcinoma and endocervical adenocarcinoma</b> |             | <b>Cholangiocarcinoma</b>      |             | <b>Colon adenocarcinoma</b>              |             |
| id                                                     | Correlation | id                                       | Correlation | id                               | Correlation | id                                                                      | Correlation | id                             | Correlation | id                                       | Correlation |
| hsa-mir-4746                                           | 0.7432      | hsa-mir-18a                              | 0.6069      | hsa-mir-130b                     | 0.6113      | hsa-mir-942                                                             | 0.4858      | hsa-mir-222                    | 0.7692      | hsa-mir-548d-1                           | 0.432       |
| hsa-mir-130b                                           | 0.707       | hsa-mir-7-3                              | 0.5583      | hsa-mir-301b                     | 0.6108      | hsa-mir-18a                                                             | 0.4798      | hsa-mir-92b                    | 0.7686      | hsa-mir-590                              | 0.4131      |
| hsa-mir-6783                                           | 0.6017      | hsa-mir-942                              | 0.551       | hsa-mir-1301                     | 0.5946      | hsa-mir-130b                                                            | 0.4436      | hsa-mir-21                     | 0.7583      | hsa-mir-577                              | 0.4083      |
| hsa-mir-106b                                           | 0.5964      | hsa-mir-629                              | 0.5413      | hsa-mir-93                       | 0.5746      | hsa-mir-1307                                                            | 0.4415      | hsa-mir-221                    | 0.7479      | hsa-mir-16-2                             | 0.4008      |
| hsa-mir-301b                                           | 0.5858      | hsa-mir-1285-1                           | 0.5376      | hsa-mir-301a                     | 0.574       | hsa-mir-17                                                              | 0.4411      | hsa-mir-183                    | 0.7326      | hsa-mir-16-1                             | 0.4006      |
| hsa-mir-5003                                           | 0.5623      | hsa-mir-17                               | 0.5317      | hsa-mir-18a                      | 0.5615      | hsa-mir-92a-2                                                           | 0.4342      | hsa-mir-330                    | 0.7298      | hsa-mir-1285-1                           | 0.3974      |
| hsa-mir-1246                                           | 0.547       | hsa-mir-3934                             | 0.5311      | hsa-mir-17                       | 0.5537      | hsa-mir-15b                                                             | 0.4321      | hsa-mir-454                    | 0.7071      | hsa-mir-7-2                              | 0.3889      |
| hsa-mir-3677                                           | 0.544       | hsa-mir-19a                              | 0.5224      | hsa-mir-1307                     | 0.5517      | hsa-mir-92a-1                                                           | 0.432       | hsa-mir-27a                    | 0.7039      | hsa-mir-301a                             | 0.3871      |
| hsa-mir-3127                                           | 0.53        | hsa-mir-92a-2                            | 0.5127      | hsa-mir-210                      | 0.5454      | hsa-mir-93                                                              | 0.4035      | hsa-mir-182                    | 0.702       | hsa-mir-7-1                              | 0.3859      |
| hsa-mir-3170                                           | 0.5156      | hsa-mir-92a-1                            | 0.5112      | hsa-mir-106b                     | 0.5444      | hsa-mir-106b                                                            | 0.398       | hsa-mir-96                     | 0.6857      | hsa-mir-106a                             | 0.3845      |
| <b>Lymphoid Neoplasm Diffuse Large B-cell Lymphoma</b> |             | <b>Esophageal carcinoma</b>              |             | <b>Glioblastoma multiforme</b>   |             | <b>Head and neck squamous cell carcinoma</b>                            |             | <b>Kidney chromophobe</b>      |             | <b>Kidney renal clear cell carcinoma</b> |             |
| id                                                     | Correlation | id                                       | Correlation | id                               | Correlation | id                                                                      | Correlation | id                             | Correlation | id                                       | Correlation |
| hsa-mir-20a                                            | 0.5552      | hsa-mir-4746                             | 0.5958      | hsa-mir-4728                     | 0.9872      | hsa-mir-4746                                                            | 0.5036      | hsa-mir-15b                    | 0.7155      | hsa-mir-21                               | 0.68        |
| hsa-mir-3662                                           | 0.555       | hsa-mir-106b                             | 0.573       | hsa-mir-450b                     | 0.9744      | hsa-mir-7-1                                                             | 0.4736      | hsa-mir-106b                   | 0.6301      | hsa-mir-155                              | 0.6365      |
| hsa-mir-17                                             | 0.5115      | hsa-mir-15b                              | 0.5703      | hsa-mir-3913-1                   | 0.9559      | hsa-mir-1910                                                            | 0.4733      | hsa-mir-93                     | 0.6114      | hsa-mir-130b                             | 0.6182      |
| hsa-mir-573                                            | 0.5011      | hsa-mir-1285-1                           | 0.5653      | hsa-mir-3913-2                   | 0.9559      | hsa-mir-21                                                              | 0.4719      | hsa-mir-25                     | 0.5588      | hsa-mir-106b                             | 0.5997      |
| hsa-mir-7974                                           | 0.4891      | hsa-mir-18a                              | 0.5544      | hsa-mir-203a                     | 0.9554      | hsa-mir-7-3                                                             | 0.4592      | hsa-mir-16-2                   | 0.5429      | hsa-mir-625                              | 0.5922      |
| hsa-mir-412                                            | 0.4721      | hsa-mir-942                              | 0.5395      | hsa-mir-6767                     | 0.9364      | hsa-mir-1307                                                            | 0.4548      | hsa-mir-16-1                   | 0.5388      | hsa-mir-142                              | 0.5771      |
| hsa-mir-548d-1                                         | 0.4559      | hsa-mir-1268a                            | 0.5384      | hsa-mir-3176                     | 0.9318      | hsa-mir-196b                                                            | 0.4547      | hsa-mir-1285-2                 | 0.5353      | hsa-mir-4677                             | 0.5349      |
| hsa-mir-19a                                            | 0.4462      | hsa-mir-196b                             | 0.5369      | hsa-mir-1269a                    | 0.9314      | hsa-mir-18a                                                             | 0.4497      | hsa-mir-425                    | 0.5335      | hsa-mir-25                               | 0.5122      |
| hsa-mir-496                                            | 0.4316      | hsa-mir-1268b                            | 0.5323      | hsa-mir-7854                     | 0.9239      | hsa-mir-15b                                                             | 0.4494      | hsa-mir-130b                   | 0.5246      | hsa-mir-28                               | 0.5041      |
| hsa-mir-18a                                            | 0.4213      | hsa-mir-17                               | 0.5308      | hsa-mir-4528                     | 0.9201      | hsa-mir-130b                                                            | 0.4422      | hsa-mir-3909                   | 0.5169      | hsa-mir-3613                             | 0.4998      |
| <b>Kidney renal papillary cell carcinoma</b>           |             | <b>Acute myeloid leukemia</b>            |             | <b>Brain lower grade glioma</b>  |             | <b>Liver hepatocellular carcinoma</b>                                   |             | <b>Lung adenocarcinoma</b>     |             | <b>Lung squamous cell carcinoma</b>      |             |
| id                                                     | Correlation | id                                       | Correlation | id                               | Correlation | id                                                                      | Correlation | id                             | Correlation | id                                       | Correlation |
| hsa-mir-130b                                           | 0.5015      | hsa-mir-324                              | 0.5225      | hsa-mir-4746                     | 0.5449      | hsa-mir-4746                                                            | 0.73        | hsa-mir-1246                   | 0.6075      | hsa-mir-210                              | 0.7014      |
| hsa-mir-21                                             | 0.4896      | hsa-mir-345                              | 0.5201      | hsa-mir-130b                     | 0.4712      | hsa-mir-106b                                                            | 0.5842      | hsa-mir-130b                   | 0.543       | hsa-mir-130b                             | 0.655       |
| hsa-mir-4746                                           | 0.4879      | hsa-mir-10b                              | 0.4907      | hsa-mir-93                       | 0.4365      | hsa-mir-3677                                                            | 0.5749      | hsa-mir-9-3                    | 0.5262      | hsa-mir-205                              | 0.6166      |
| hsa-mir-106b                                           | 0.4737      | hsa-mir-589                              | 0.4434      | hsa-mir-301b                     | 0.4206      | hsa-mir-93                                                              | 0.5723      | hsa-mir-9-2                    | 0.5261      | hsa-mir-9-1                              | 0.612       |
| hsa-mir-17                                             | 0.4141      | hsa-mir-185                              | 0.4238      | hsa-mir-7974                     | 0.4021      | hsa-mir-6783                                                            | 0.5515      | hsa-mir-9-1                    | 0.5261      | hsa-mir-9-2                              | 0.612       |
| hsa-mir-93                                             | 0.4069      | hsa-mir-130b                             | 0.4224      | hsa-mir-6783                     | 0.3997      | hsa-mir-18a                                                             | 0.5133      | hsa-mir-128-2                  | 0.5179      | hsa-mir-9-3                              | 0.612       |
| hsa-mir-210                                            | 0.3888      | hsa-mir-148a                             | 0.421       | hsa-mir-196a-2                   | 0.393       | hsa-mir-877                                                             | 0.5133      | hsa-mir-128-1                  | 0.5165      | hsa-mir-183                              | 0.61        |
| hsa-mir-4758                                           | 0.3831      | hsa-mir-18a                              | 0.4053      | hsa-mir-196a-1                   | 0.3896      | hsa-mir-21                                                              | 0.5127      | hsa-mir-1285-1                 | 0.5103      | hsa-mir-301b                             | 0.5999      |
| hsa-mir-4677                                           | 0.3811      | hsa-let-7i                               | 0.3969      | hsa-mir-15b                      | 0.3825      | hsa-mir-1180                                                            | 0.5084      | hsa-mir-548d-1                 | 0.5014      | hsa-mir-4652                             | 0.5928      |
| hsa-mir-584                                            | 0.3728      | hsa-mir-214                              | 0.3943      | hsa-mir-615                      | 0.3665      | hsa-mir-589                                                             | 0.5037      | hsa-mir-629                    | 0.4909      | hsa-mir-1268b                            | 0.5902      |
| <b>Mesothelioma</b>                                    |             | <b>Ovarian serous cystadenocarcinoma</b> |             | <b>Pancreatic adenocarcinoma</b> |             | <b>Pheochromocytoma and Paraganglioma</b>                               |             | <b>Prostate adenocarcinoma</b> |             | <b>Rectum adenocarcinoma</b>             |             |
| id                                                     | Correlation | id                                       | Correlation | id                               | Correlation | id                                                                      | Correlation | id                             | Correlation | id                                       | Correlation |
| hsa-mir-6783                                           | 0.5818      | hsa-mir-18a                              | 0.4176      | hsa-mir-135b                     | 0.536       | hsa-mir-210                                                             | 0.4067      | hsa-mir-15b                    | 0.5625      | hsa-mir-1285-2                           | 0.6078      |
| hsa-mir-130b                                           | 0.58        | hsa-mir-940                              | 0.4021      | hsa-mir-196b                     | 0.5304      | hsa-mir-130b                                                            | 0.3308      | hsa-mir-425                    | 0.5577      | hsa-mir-1285-1                           | 0.5945      |
| hsa-mir-3662                                           | 0.5004      | hsa-mir-130b                             | 0.3717      | hsa-mir-21                       | 0.5243      | hsa-mir-301a                                                            | 0.3147      | hsa-mir-93                     | 0.5088      | hsa-mir-577                              | 0.585       |
| hsa-mir-503                                            | 0.4791      | hsa-mir-4746                             | 0.3707      | hsa-mir-224                      | 0.5139      | hsa-mir-4691                                                            | 0.2963      | hsa-mir-191                    | 0.5029      | hsa-mir-203b                             | 0.5575      |
| hsa-mir-4746                                           | 0.459       | hsa-mir-4664                             | 0.3513      | hsa-mir-584                      | 0.4984      | hsa-mir-378f                                                            | 0.2721      | hsa-mir-21                     | 0.5023      | hsa-mir-19a                              | 0.5484      |
| hsa-mir-1305                                           | 0.4249      | hsa-mir-1914                             | 0.3468      | hsa-mir-222                      | 0.4976      | hsa-mir-1226                                                            | 0.2708      | hsa-mir-25                     | 0.4976      | hsa-mir-3677                             | 0.5432      |
| hsa-mir-21                                             | 0.415       | hsa-mir-3677                             | 0.3327      | hsa-mir-196a-1                   | 0.4902      | hsa-mir-4746                                                            | 0.2624      | hsa-mir-183                    | 0.4925      | hsa-mir-203a                             | 0.5424      |
| hsa-mir-5695                                           | 0.4041      | hsa-mir-6783                             | 0.3254      | hsa-mir-210                      | 0.4893      | hsa-mir-301b                                                            | 0.2561      | hsa-mir-106b                   | 0.4786      | hsa-mir-106a                             | 0.5316      |
| hsa-mir-301b                                           | 0.4034      | hsa-mir-1273a                            | 0.3223      | hsa-mir-196a-2                   | 0.4868      | hsa-mir-3179-1                                                          | 0.248       | hsa-mir-96                     | 0.4737      | hsa-mir-130b                             | 0.5197      |
| hsa-mir-1293                                           | 0.3984      | hsa-mir-3200                             | 0.3217      | hsa-mir-106b                     | 0.4761      | hsa-mir-3179-3                                                          | 0.248       | hsa-mir-182                    | 0.4631      | hsa-mir-628                              | 0.5112      |
| <b>Sarcoma</b>                                         |             | <b>Skin cutaneous melanoma</b>           |             | <b>Stomach adenocarcinoma</b>    |             | <b>Testicular germ cell tumours</b>                                     |             | <b>Thyroid carcinoma</b>       |             | <b>Thymoma</b>                           |             |
| id                                                     | Correlation | id                                       | Correlation | id                               | Correlation | id                                                                      | Correlation | id                             | Correlation | id                                       | Correlation |
| hsa-mir-4746                                           | 0.6776      | hsa-mir-4746                             | 0.5606      | hsa-mir-130b                     | 0.7276      | hsa-mir-302c                                                            | 0.7252      | hsa-mir-155                    | 0.5736      | hsa-mir-942                              | 0.913       |
| hsa-mir-130b                                           | 0.5948      | hsa-mir-130b                             | 0.5068      | hsa-mir-106b                     | 0.6995      | hsa-mir-3937                                                            | 0.7245      | hsa-mir-4491                   | 0.5627      | hsa-mir-106a                             | 0.9052      |
| hsa-mir-93                                             | 0.5914      | hsa-mir-1246                             | 0.4592      | hsa-mir-942                      | 0.6892      | hsa-mir-367                                                             | 0.7079      | hsa-mir-142                    | 0.5138      | hsa-mir-4746                             | 0.8969      |
| hsa-mir-15b                                            | 0.5744      | hsa-mir-3682                             | 0.4531      | hsa-mir-183                      | 0.6753      | hsa-mir-522                                                             | 0.7001      | hsa-mir-625                    | 0.4681      | hsa-mir-548d-1                           | 0.8835      |
| hsa-mir-106b                                           | 0.5426      | hsa-mir-942                              | 0.4437      | hsa-mir-18a                      | 0.6705      | hsa-mir-302a                                                            | 0.6926      | hsa-mir-150                    | 0.4535      | hsa-mir-196b                             | 0.8833      |
| hsa-mir-942                                            | 0.5097      | hsa-mir-7974                             | 0.4399      | hsa-mir-200a                     | 0.6655      | hsa-mir-1283-1                                                          | 0.6731      | hsa-mir-3150b                  | 0.4501      | hsa-mir-18a                              | 0.8798      |
| hsa-mir-18a                                            | 0.494       | hsa-mir-6783                             | 0.4229      | hsa-mir-429                      | 0.6615      | hsa-mir-1283-2                                                          | 0.6731      | hsa-mir-5571                   | 0.4338      | hsa-mir-130b                             | 0.8747      |
| hsa-mir-210                                            | 0.4925      | hsa-mir-15b                              | 0.4041      | hsa-mir-222                      | 0.651       | hsa-mir-516a-2                                                          | 0.6666      | hsa-mir-766                    | 0.4323      | hsa-mir-18b                              | 0.8746      |
| hsa-mir-6783                                           | 0.4735      | hsa-mir-3662                             | 0.3855      | hsa-mir-1307                     | 0.6484      | hsa-mir-516a-1                                                          | 0.6666      | hsa-mir-342                    | 0.4302      | hsa-mir-548d-2                           | 0.8722      |
| hsa-mir-454                                            | 0.4708      | hsa-mir-4440                             | 0.3771      | hsa-mir-200b                     | 0.6474      | hsa-mir-519a-1                                                          | 0.6643      | hsa-mir-7702                   | 0.4167      | hsa-mir-93                               | 0.8697      |
| <b>Uterine corpus endometrial carcinoma</b>            |             | <b>Uterine carcinosarcoma</b>            |             | <b>Uveal melanoma</b>            |             |                                                                         |             |                                |             |                                          |             |
| id                                                     | Correlation | id                                       | Correlation | id                               | Correlation |                                                                         |             |                                |             |                                          |             |
| hsa-mir-130b                                           | 0.6376      | hsa-mir-93                               | 0.4409      | hsa-mir-6783                     | 0.4351      |                                                                         |             |                                |             |                                          |             |
| hsa-mir-15b                                            | 0.6355      | hsa-mir-25                               | 0.4338      | hsa-let-7b                       | 0.4106      |                                                                         |             |                                |             |                                          |             |
| hsa-mir-1307                                           | 0.6152      | hsa-mir-5585                             | 0.4273      | hsa-mir-937                      | 0.4086      |                                                                         |             |                                |             |                                          |             |
| hsa-mir-18a                                            | 0.6096      | hsa-mir-1272                             | 0.4159      | hsa-mir-548d-1                   | 0.3778      |                                                                         |             |                                |             |                                          |             |
| hsa-mir-301b                                           | 0.5741      | hsa-mir-106b                             | 0.4132      | hsa-mir-362                      | 0.3694      |                                                                         |             |                                |             |                                          |             |
| hsa-mir-183                                            | 0.5656      | hsa-mir-561                              | 0.4026      | hsa-mir-670                      | 0.3593      |                                                                         |             |                                |             |                                          |             |
| hsa-mir-877                                            | 0.564       | hsa-mir-33a                              | 0.3855      | hsa-mir-1254-1                   | 0.3566      |                                                                         |             |                                |             |                                          |             |
| hsa-mir-548d-1                                         | 0.5632      | hsa-mir-7974                             | 0.379       | hsa-mir-1254-2                   | 0.3558      |                                                                         |             |                                |             |                                          |             |
| hsa-mir-942                                            | 0.5632      | hsa-mir-15b                              | 0.369       | hsa-mir-675                      | 0.3494      |                                                                         |             |                                |             |                                          |             |
| hsa-mir-1246                                           | 0.5618      | hsa-mir-523                              | 0.3627      | hsa-let-7a-3                     | 0.3477      |                                                                         |             |                                |             |                                          |             |

**Figure S5: Top 10 MiRs Correlating with PLK1 Expression in Cancers of the TCGA Data Set.** Small RNA-seq/- qRT-PCR-identified PLK1-regulated miRs are highlighted in blue boxes. Correlation refers to Pearson's correlation coefficient. Data relating to **Fig 1** are shown.

**A**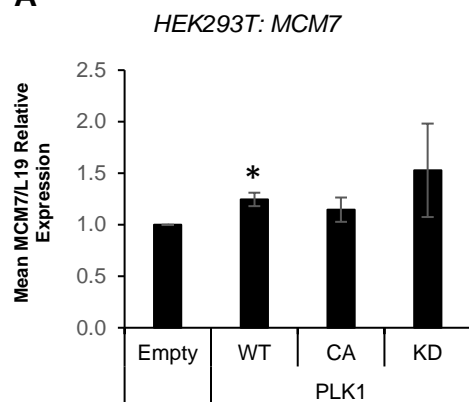**B**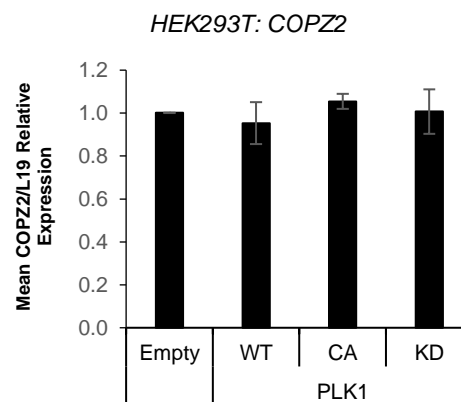

**Figure S6: PLK1 does not Modulate Host Genes of Intronic PLK1-Regulated MiRs.** PLK1-regulated miR-93-3p is found within an intron of protein-coding MCM7 gene, whilst PLK1-regulated miR-152 is within an intron of COPZ2. *A,B*) qRT-PCR analysis of *A*) MCM7 and *B*) COPZ2 transcript levels in HEK293T cells transfected with empty plasmid, PLK1 WT, PLK1-T<sup>210</sup>D (constitutively-active) or PLK1-K<sup>82</sup>R (kinase-dead) for 72h. *Columns:* mean relative transcript levels normalised to L19 for three independent experiments performed in triplicate  $\pm$  SEM. \*  $P \leq 0.05$  vs empty plasmid control. Data relating to **Fig 2** are shown.

### HEK293T: L19 Expression

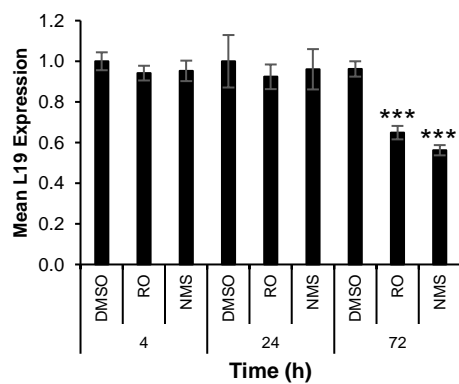

**Figure S7: PLK1 Inhibition Decreases L19 Expression at 72h.** qRT-PCR analysis of L19 transcript levels in HEK293T cells treated with DMSO, RO-5203280 (100nM) or NMS1286 (500nM) for 4, 24 or 72h. *Columns:* mean relative L19 transcript levels for three independent experiments performed in triplicate  $\pm$  SEM. \*\*\*  $P \leq 0.0001$  vs DMSO control. Data relating to **Fig 2** are shown.

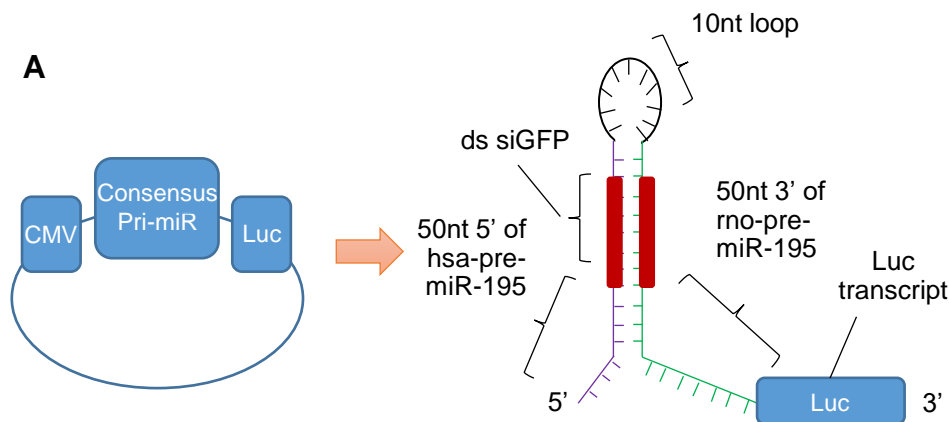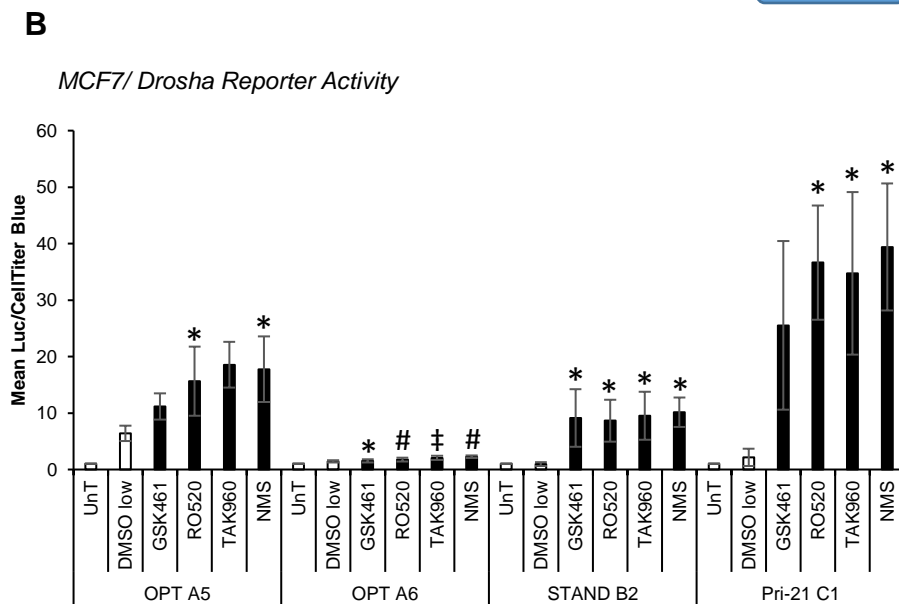

**Figure S8: PLK1 Inhibitors Reduce Activity of Luciferase-Based Drosha Reporters.** *A)* Schematic illustration of Drosha activity reporter constructs used for luciferase assays. CMV promoter drives transcription of the consensus pri-miR linked to luciferase. Drosha cleavage of the pri-miR results in loss of luciferase transcript and thus reduced luciferase activity. Hence luminescence is inversely proportional to Drosha activity. *B)* Luciferase assay analysis of MCF7 monoclonal cell lines stably expressing above Drosha reporter constructs and treated with PLK1 inhibitors (GSK461, RO-520, TAK960 – 100nM, NMS – 500nM) for 96h. Luciferase activity is inversely proportional to Drosha activity and was corrected for PLK1 inhibitor effects on cell number by CellTiter Blue assay. *Columns:* mean  $\pm$  SEM for three independent experiments performed in quadruplicate. OPT = optimal universal reporter, STAND = standard reporter, pri-21 = pri-miR-21-specific reporter (see also **Materials and Methods**). \*  $P \leq 0.05$ , #  $P \leq 0.005$ ,  $\ddagger P \leq 0.0001$ . Data relating to **Fig 2** are shown.

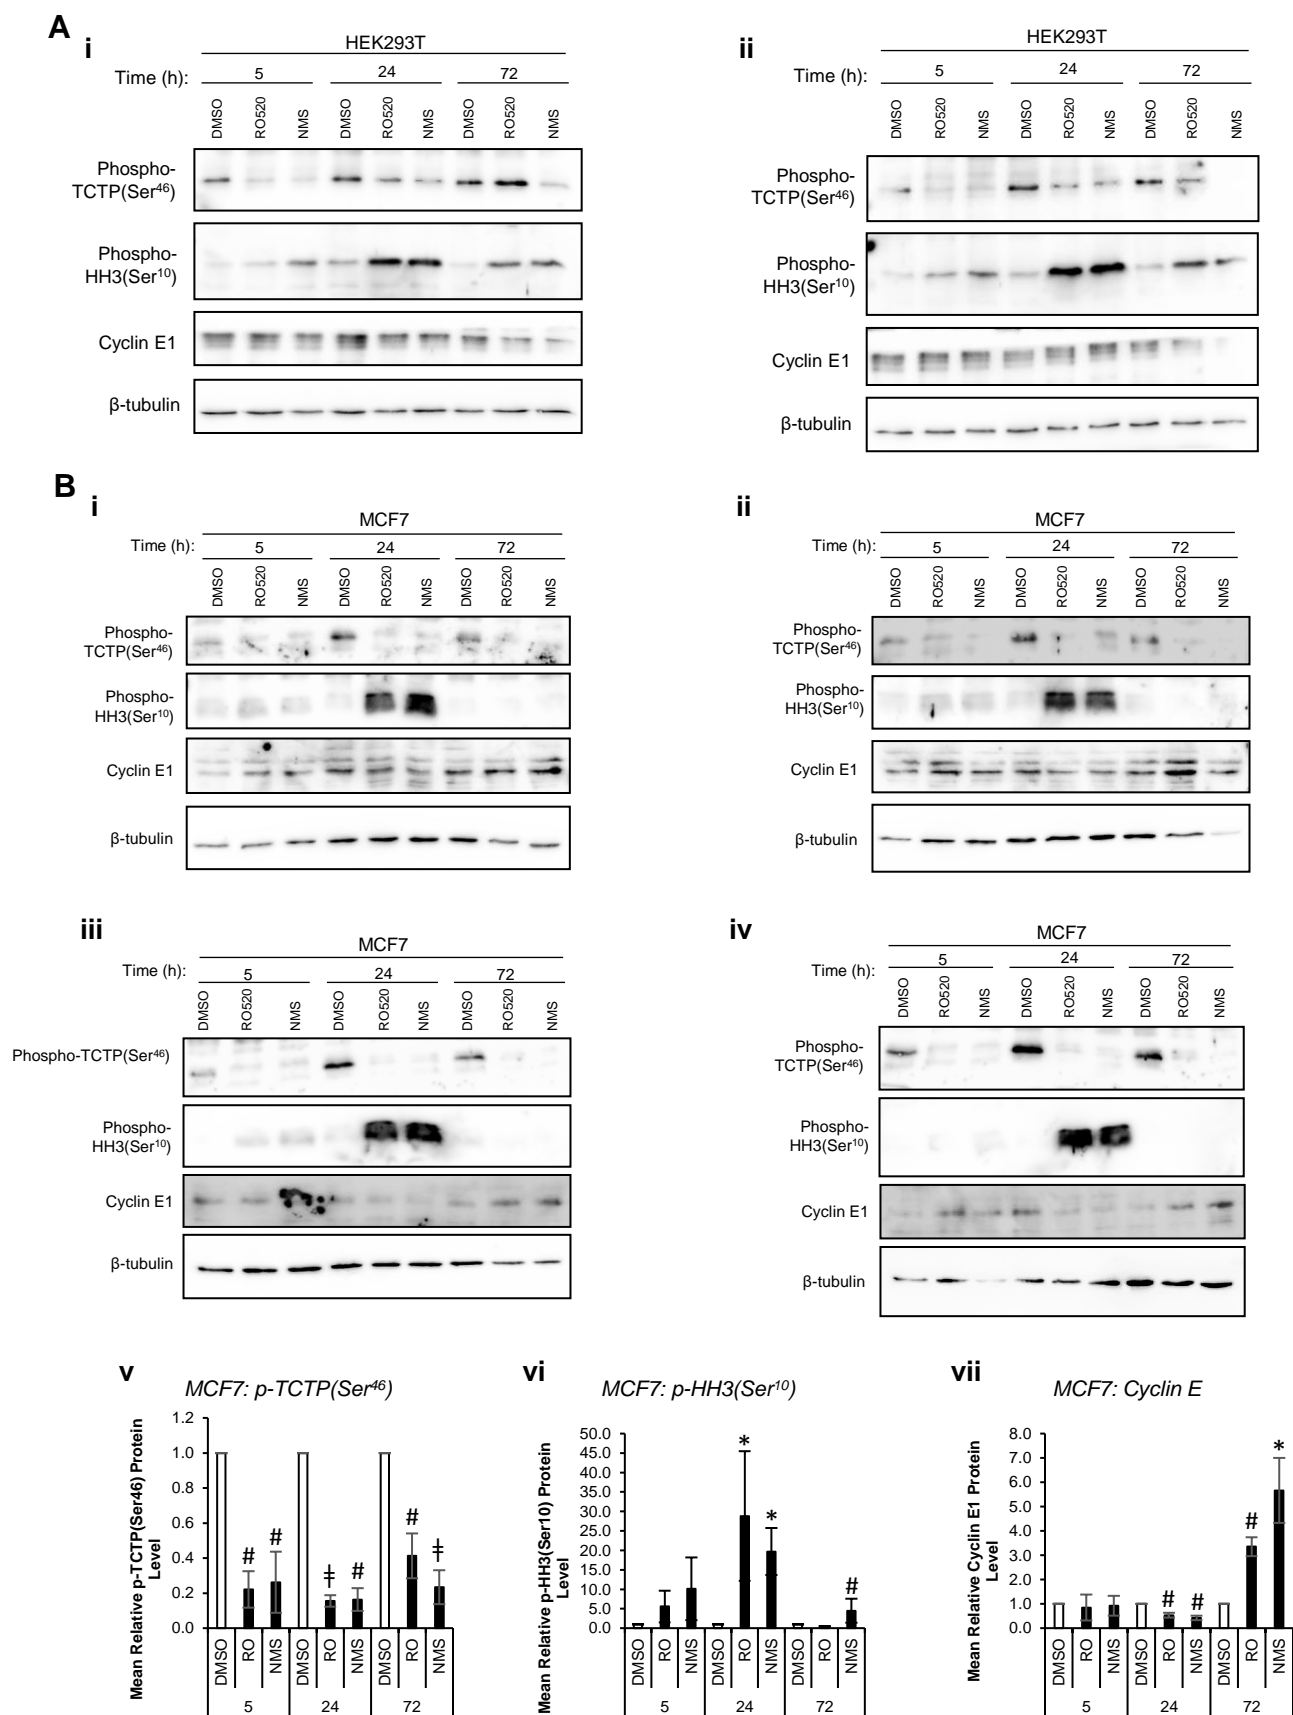

**Figure S9: PLK1 Inhibition Leads to M-Phase Cell Cycle Arrest at 24h and 72h, but not 5h, in HEK293T and MCF7 Cells.** Western blot analysis of phospho-TCTP(Ser<sup>46</sup>), phospho-Histone H3 (Ser<sup>10</sup>) and cyclin E1 protein levels in (A) HEK293T and (B) MCF7 cells treated with DMSO, RO-520 (100nM) or NMS (500nM) for 5, 24 or 72h.  $\beta$ -tubulin was used as a control for loading. (A) Independent biological repeats relating to Fig 2 are shown. Bv,vi,vii) Densitometry was performed using ImageJ. Columns: mean relative protein level for three independent biological repeats relative to DMSO control  $\pm$  SEM. Data relating to Fig 2 are shown. \*  $P \leq 0.05$ , #  $P \leq 0.005$ ,  $\ddagger P \leq 0.0001$ .

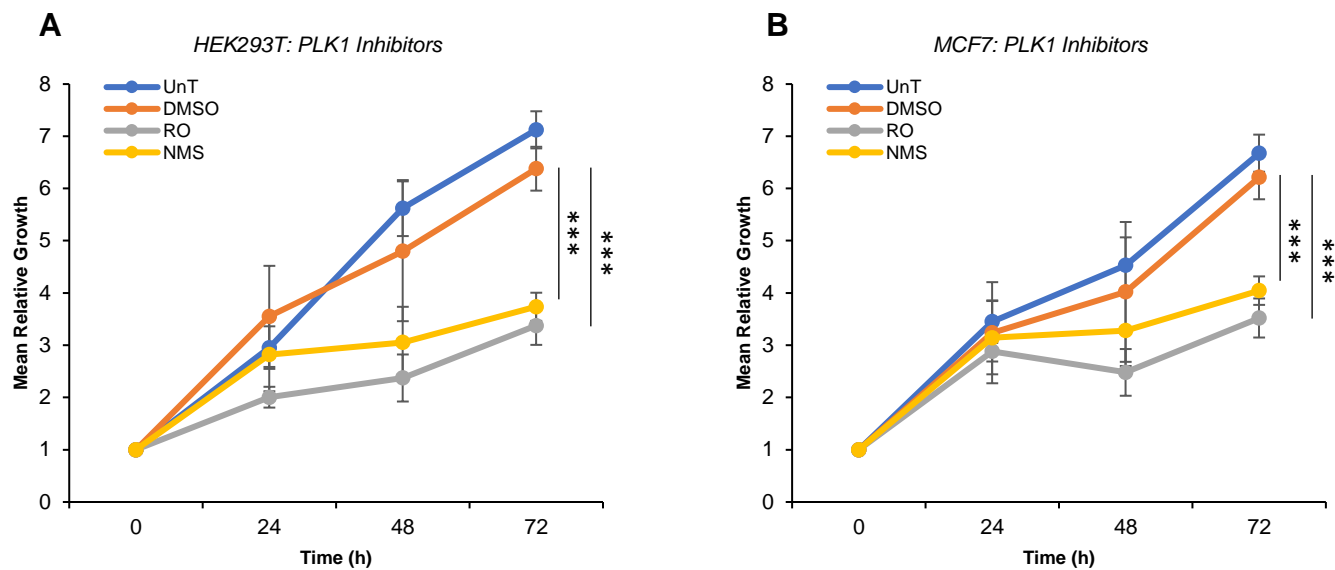

**Figure S10: Treatment of HEK293T and MCF7 Cells with PLK1 Inhibitors Significantly Reduces Cell Proliferation.** A,B) Sulphorhodamine B assay analysis of proliferation of (A) HEK2393T and (B) MCF7 cells treated  $\pm$  DMSO, RO-5203280 (100nM) or NMS1286 (500nM) for 0-72h. Data are shown relative to cell number at day 0 and represent mean  $\pm$  SEM for three independent experiments performed in quadruplicate. \*\*\*  $P \leq 0.0001$ . Data relating to **Fig 2** are shown.

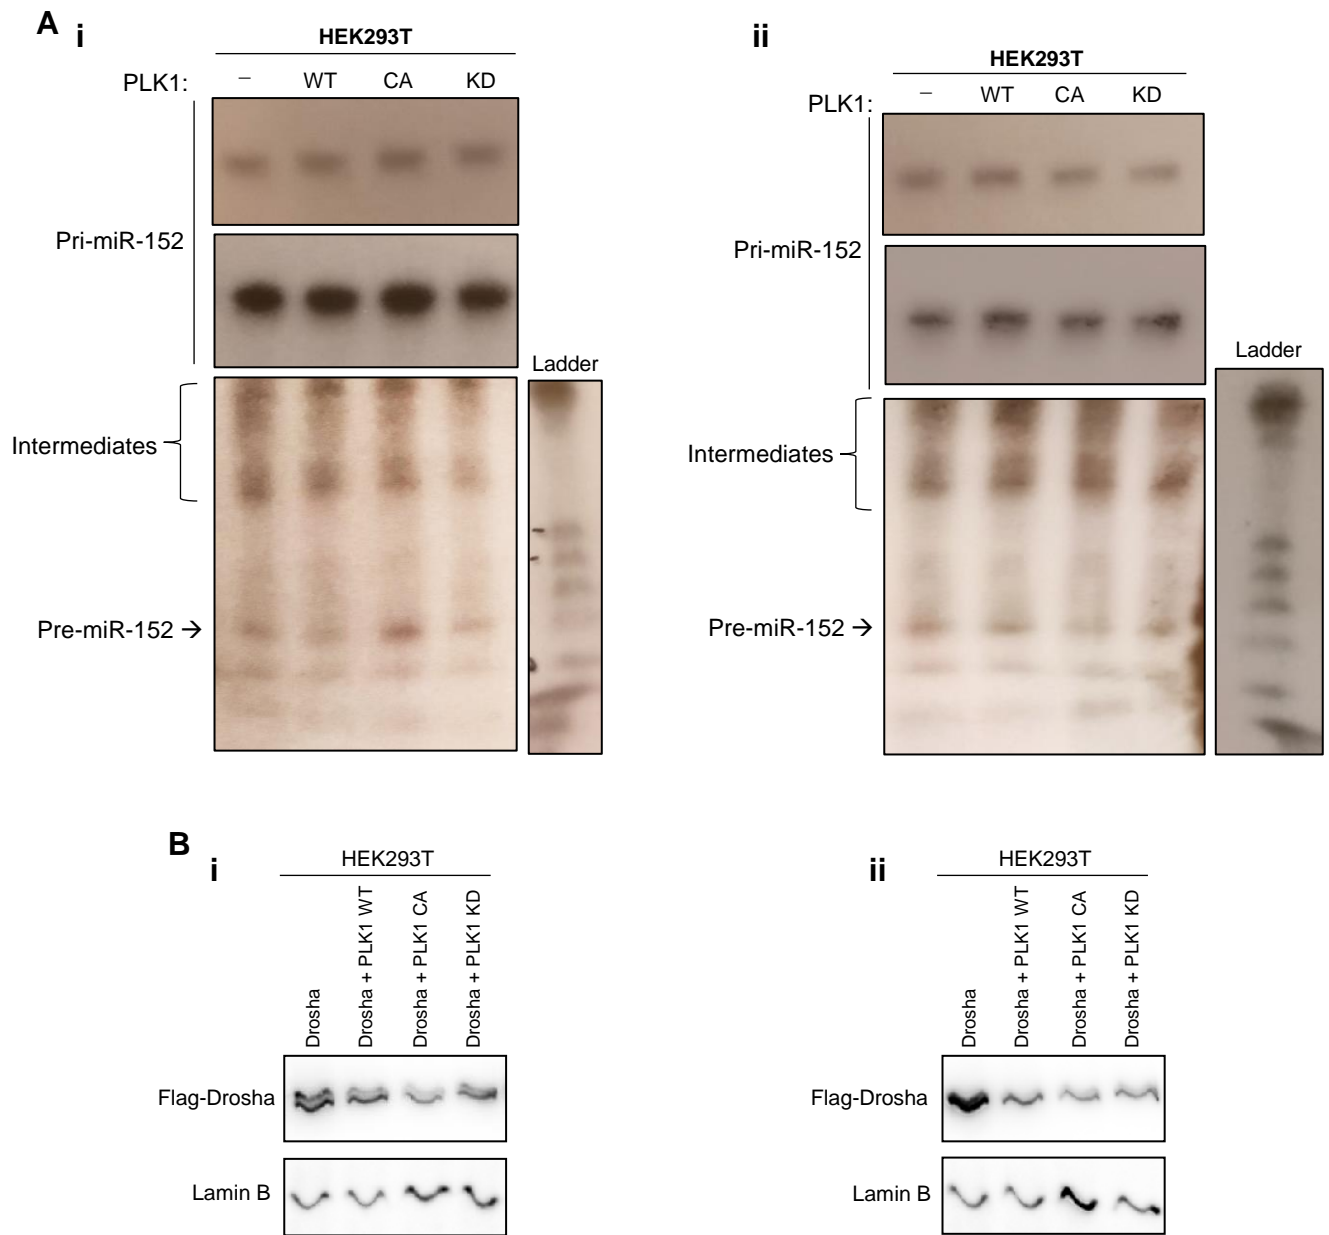

**Figure S11: PLK1 Inhibition Reduces Microprocessor-Mediated Pri-miR-152 to Pre-miR-152 Processing.** *In vitro* pri-miR processing assay analysis of Drosha activity in response to PLK1 inhibition. *In vitro*-transcribed,  $^{32}\text{P}$  radio-labelled pri-miR-152 sequence was incubated with Flag-Drosha immunoprecipitates of HEK293T cells transfected with Flag-Drosha  $\pm$  WT, constitutively-active ( $\text{T}^{210}\text{D}$ ) and kinase-dead ( $\text{K}^{82}\text{R}$ ) PLK1 for 48h. N=2 biological replicates relating to **Fig 3C** are shown. For quantification, data were normalised to Flag-Drosha input corrected for loading (from (B)). B) Western blot analysis of Drosha protein levels in lysates of HEK293T cells transfected with Flag-Drosha  $\pm$  WT, constitutively-active ( $\text{T}^{210}\text{D}$ ) and kinase-dead ( $\text{K}^{82}\text{R}$ ) PLK1 for 48h from above. Lamin B was used as a control for loading.

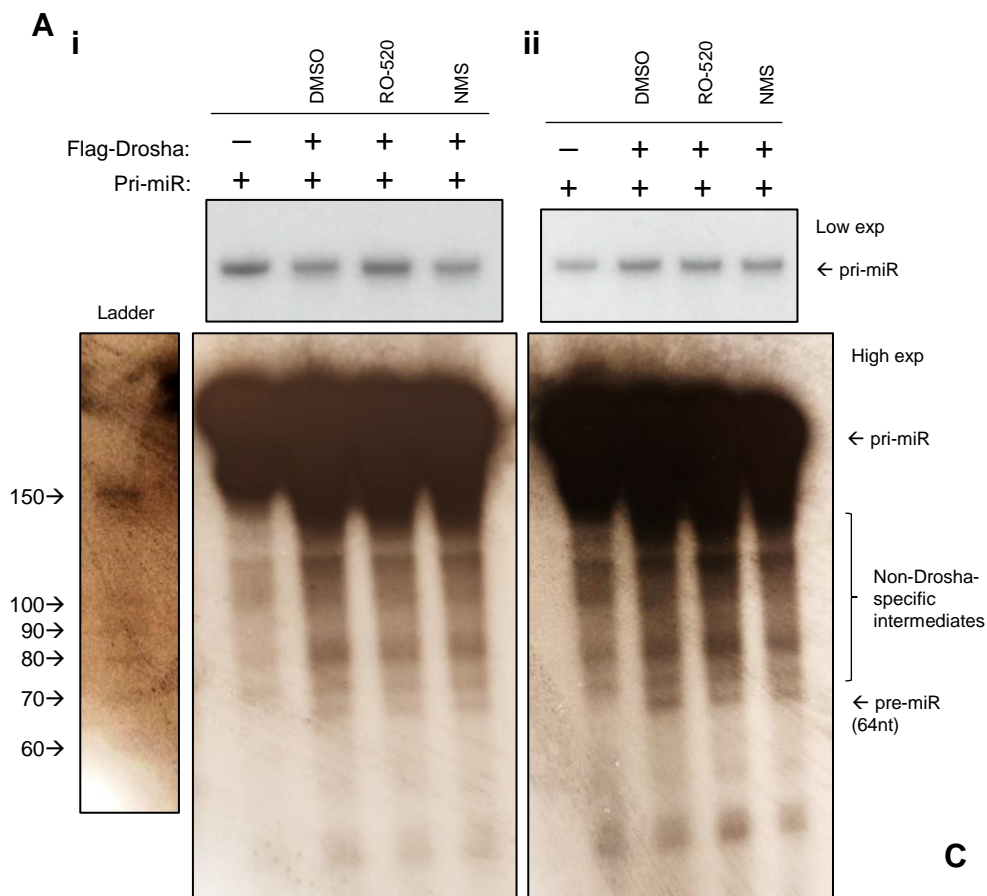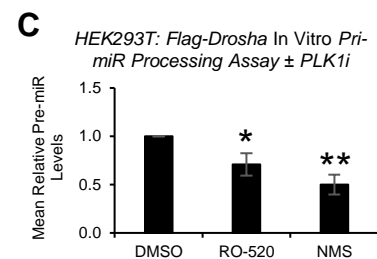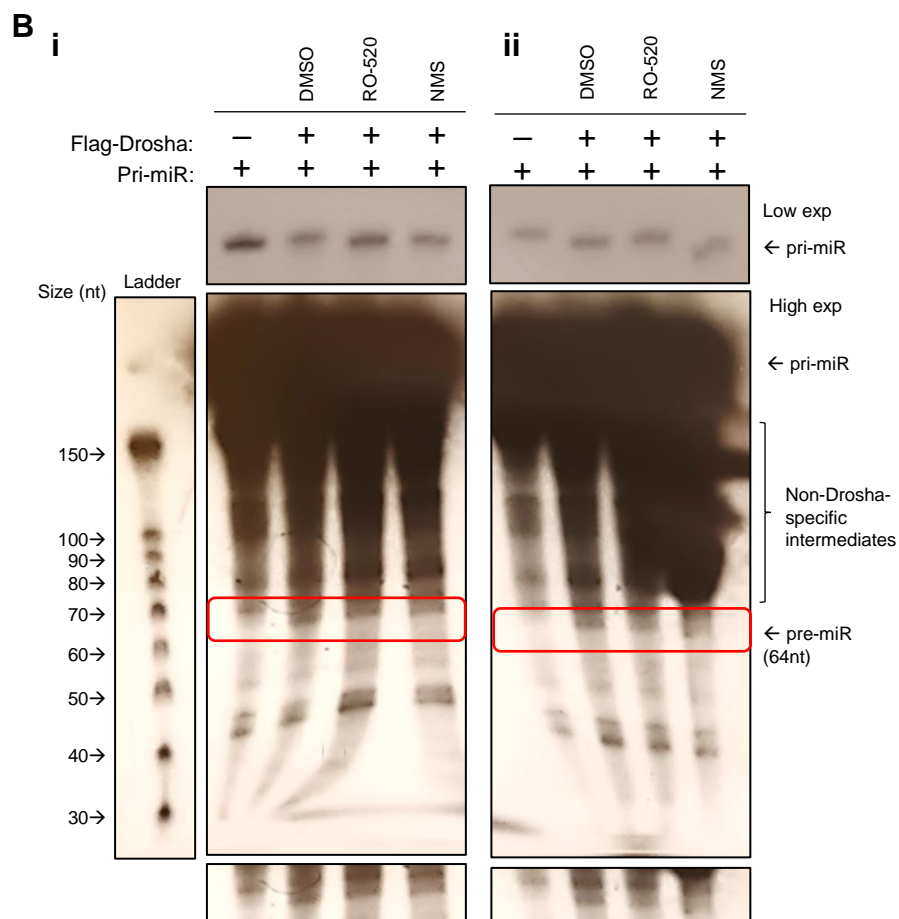

**Figure S12: PLK1 Inhibition Reduces Microprocessor-Mediated Pri-miR to Pre-miR Processing.** *In vitro* pri-miR processing assay analysis of Drosha activity in response to PLK1 inhibition. *In vitro*-transcribed,  $^{32}\text{P}$  radio-labelled artificial pri-miR sequence was incubated with Flag-Drosha immunoprecipitates of HEK293T cells treated with PLK1 inhibitors for 16h. N=3 biological replicates relating to **Fig 3C** are shown. Densitometry was performed using Image J. \*  $P \leq 0.05$ , \*\*  $P \leq 0.005$ .

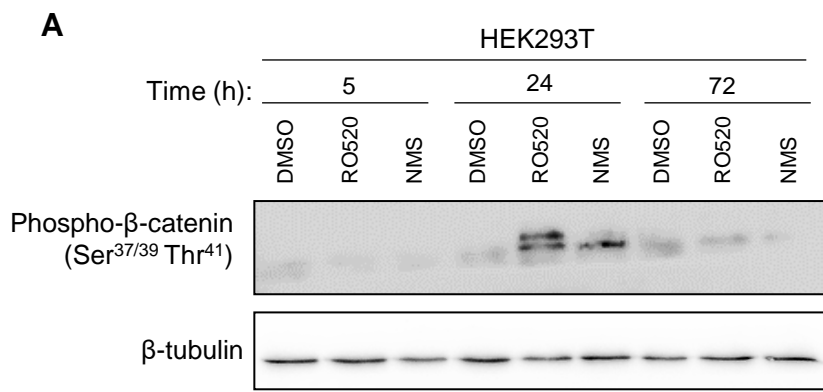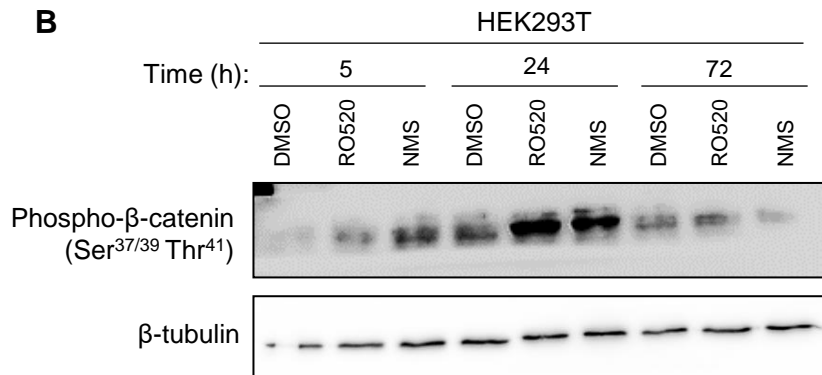

**Figure S13: Impact of PLK1 Inhibitor Treatment on GSK3 $\beta$  Activity.** A,B) Western blot analysis of phospho- $\beta$ -catenin (Ser<sup>37/39</sup> Thr<sup>41</sup>) protein levels in HEK293T cells treated with DMSO, RO-520 (100nM) or NMS (500nM) for 4, 24 and 72h.  $\beta$ -tubulin was used as a loading control. Independent biological repeats relating to **Fig 3** are shown.

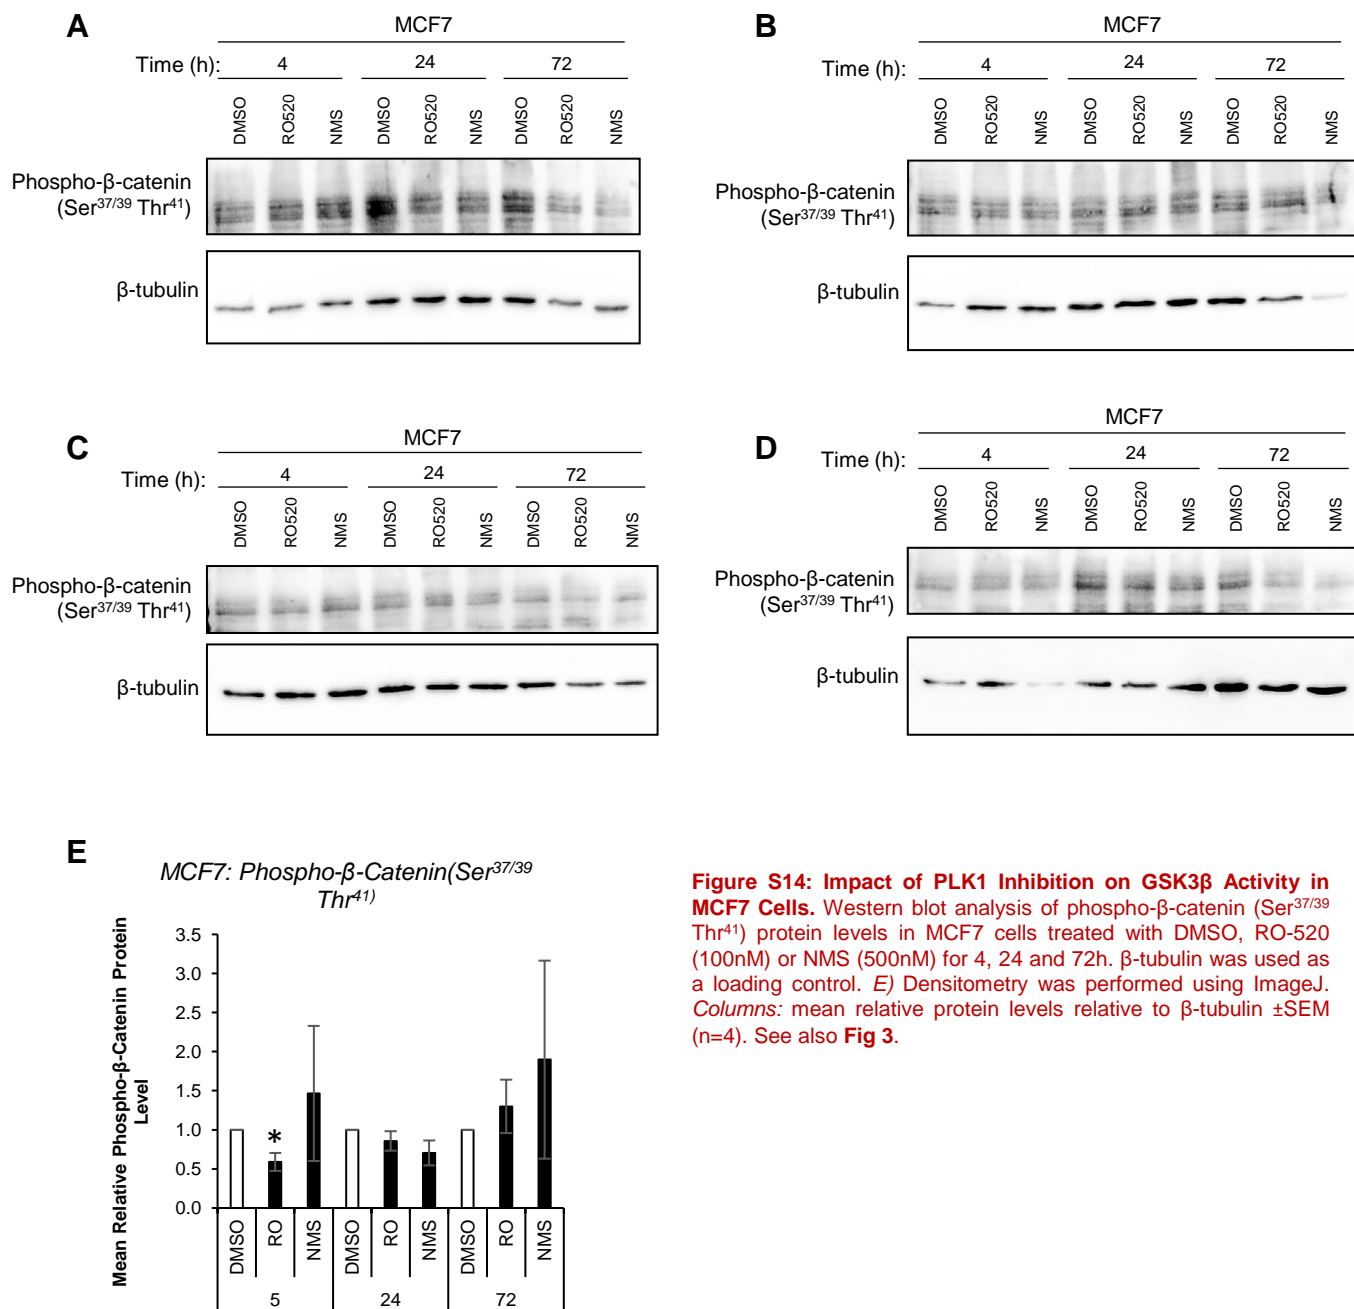

**Figure S14: Impact of PLK1 Inhibition on GSK3 $\beta$  Activity in MCF7 Cells.** Western blot analysis of phospho- $\beta$ -catenin (Ser<sup>37/39</sup> Thr<sup>41</sup>) protein levels in MCF7 cells treated with DMSO, RO-520 (100nM) or NMS (500nM) for 4, 24 and 72h.  $\beta$ -tubulin was used as a loading control. *E*) Densitometry was performed using ImageJ. Columns: mean relative protein levels relative to  $\beta$ -tubulin  $\pm$ SEM (n=4). See also Fig 3.

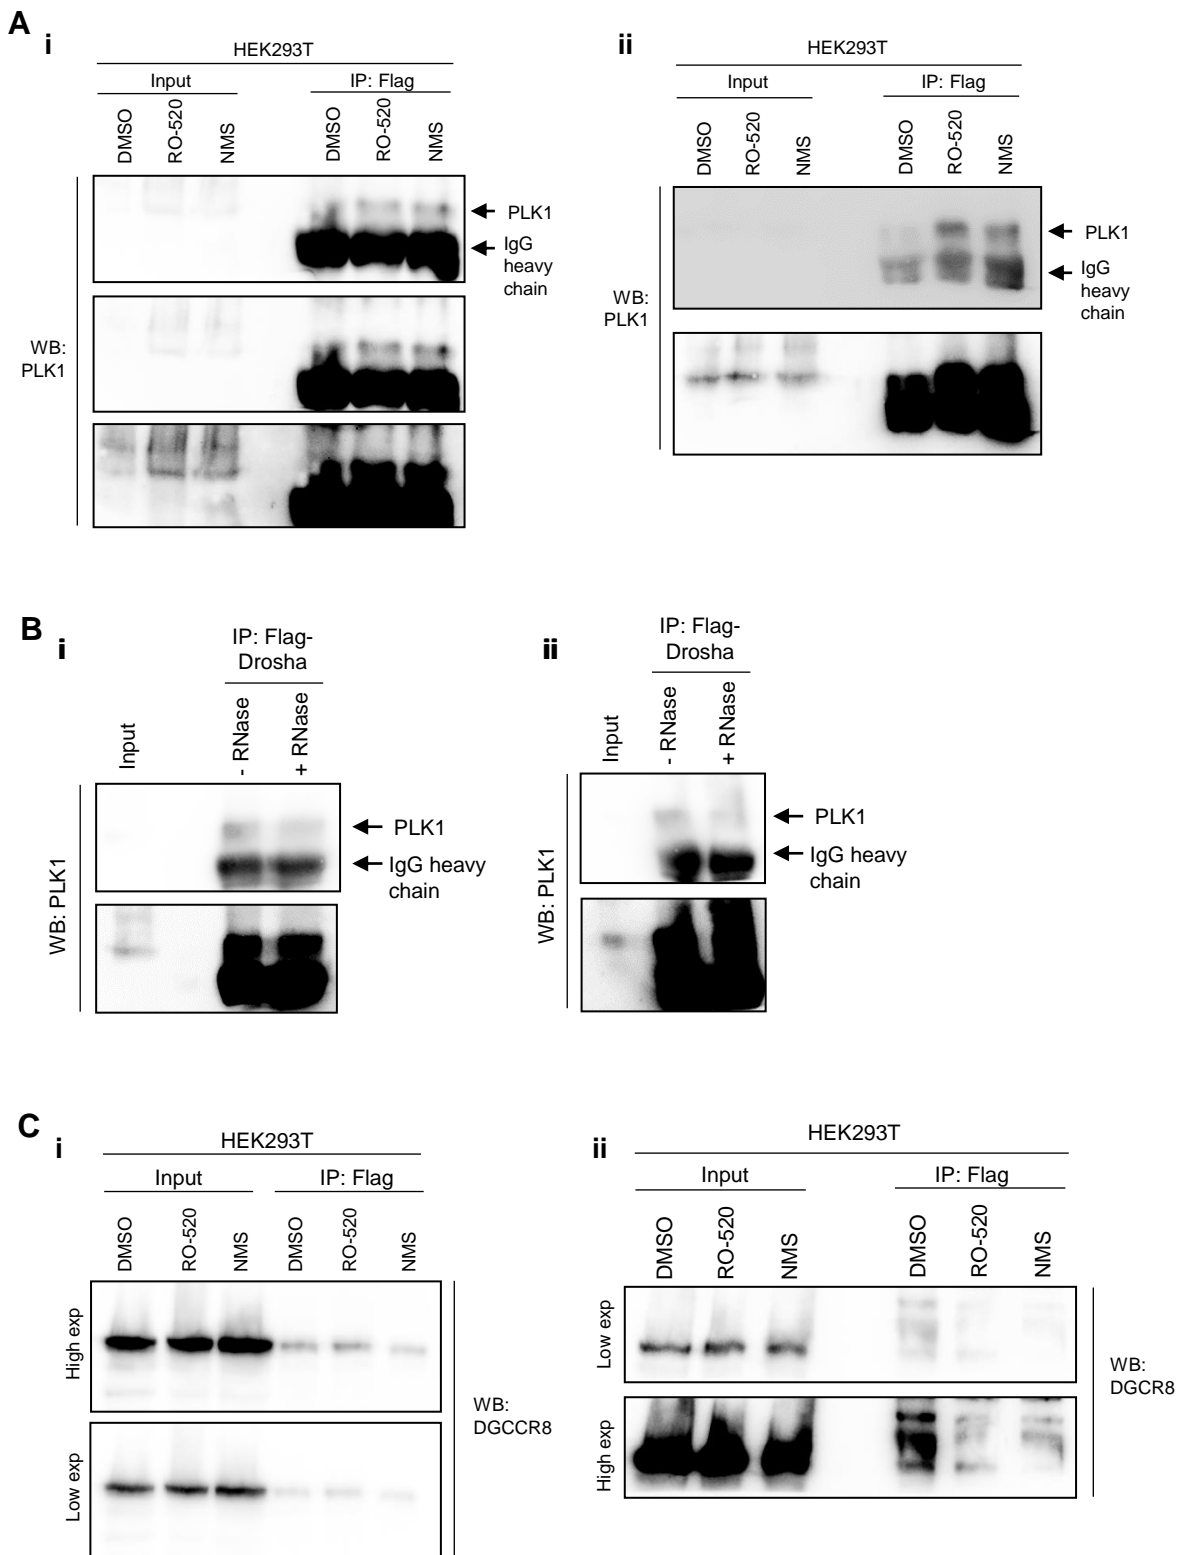

**Figure S15: PLK1 Interacts with Drosha in an RNA-Dependent Manner and Modulates its Association with DGCR8.** Western blot analysis of A,B) PLK1 and C) DGCR8 protein levels in Flag immunoprecipitates of HEK293T cells transfected with Flag-Drosha and treated with DMSO, RO-520 (100nM) or NMS (500nM) for 16h (A,C), or with RNase A (B). Independent biological repeats relating to Fig 4A, B and C are shown.

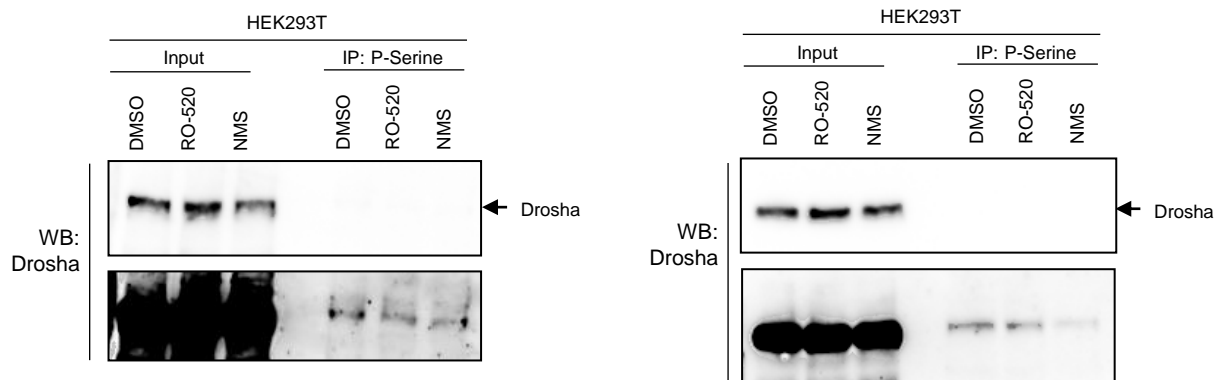

**Figure S16: PLK1 Modulates Drosha Phosphorylation.** Western blot analysis of Drosha protein levels in phospho-serine immunoprecipitates of HEK293T cells treated with DMSO, RO-520 (100nM) or NMS (500nM) for 16h. Independent biological repeats relating to **Fig 4D** are shown.

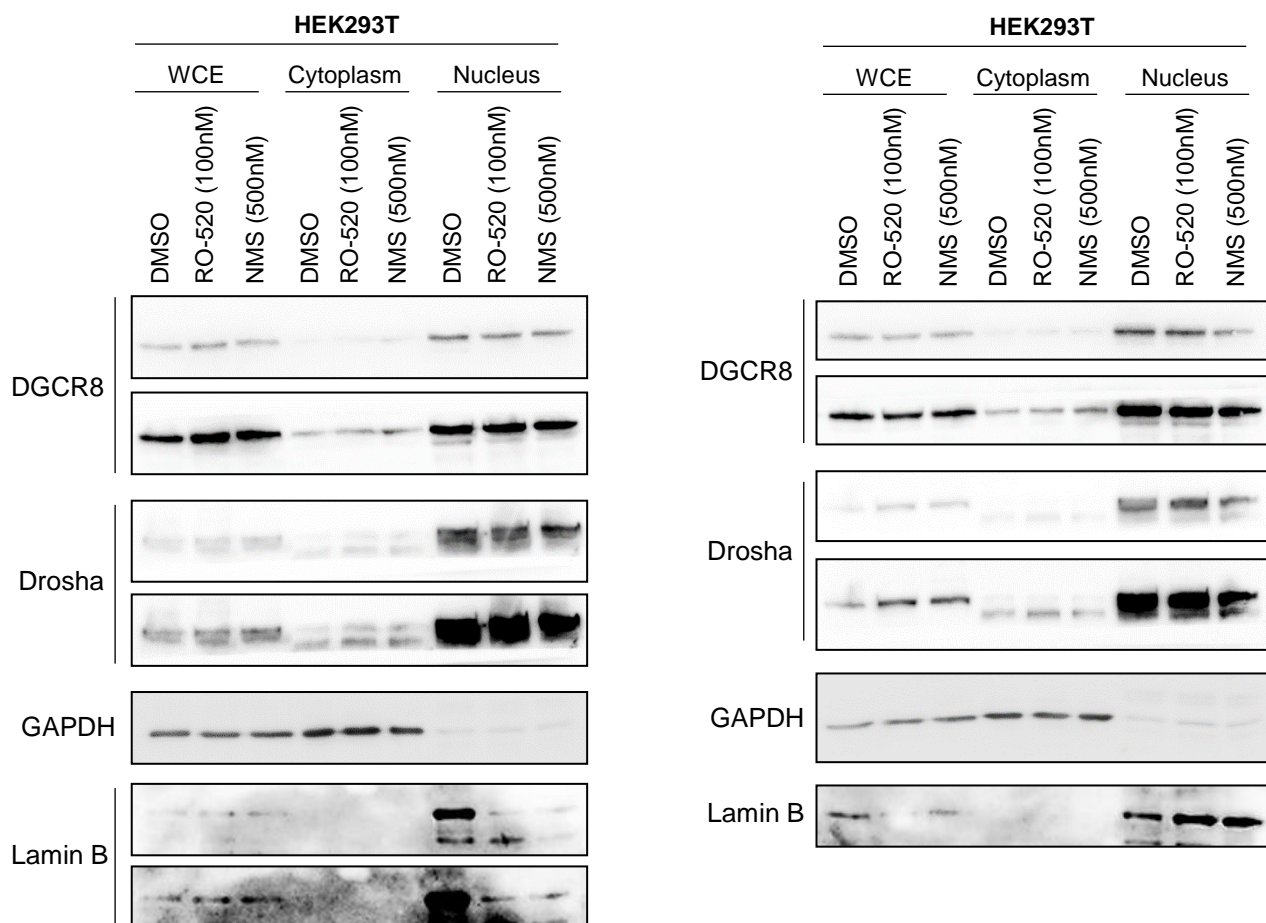

**Figure S17: Short-Term PLK1 Inhibition Modulates Drosha and DGCR8 Subcellular Localisation.** Western blot analysis of DGCR8 and Drosha protein levels in whole cell extracts (WCEs), cytoplasmic and nuclear fractions of HEK293T cells treated with DMSO, RO-520 (100nM) or NMS (500nM) for 3h. GAPDH and Lamin B were used as cytoplasmic and nuclear controls, respectively. Independent biological repeats relating to **Fig 4E** are shown.

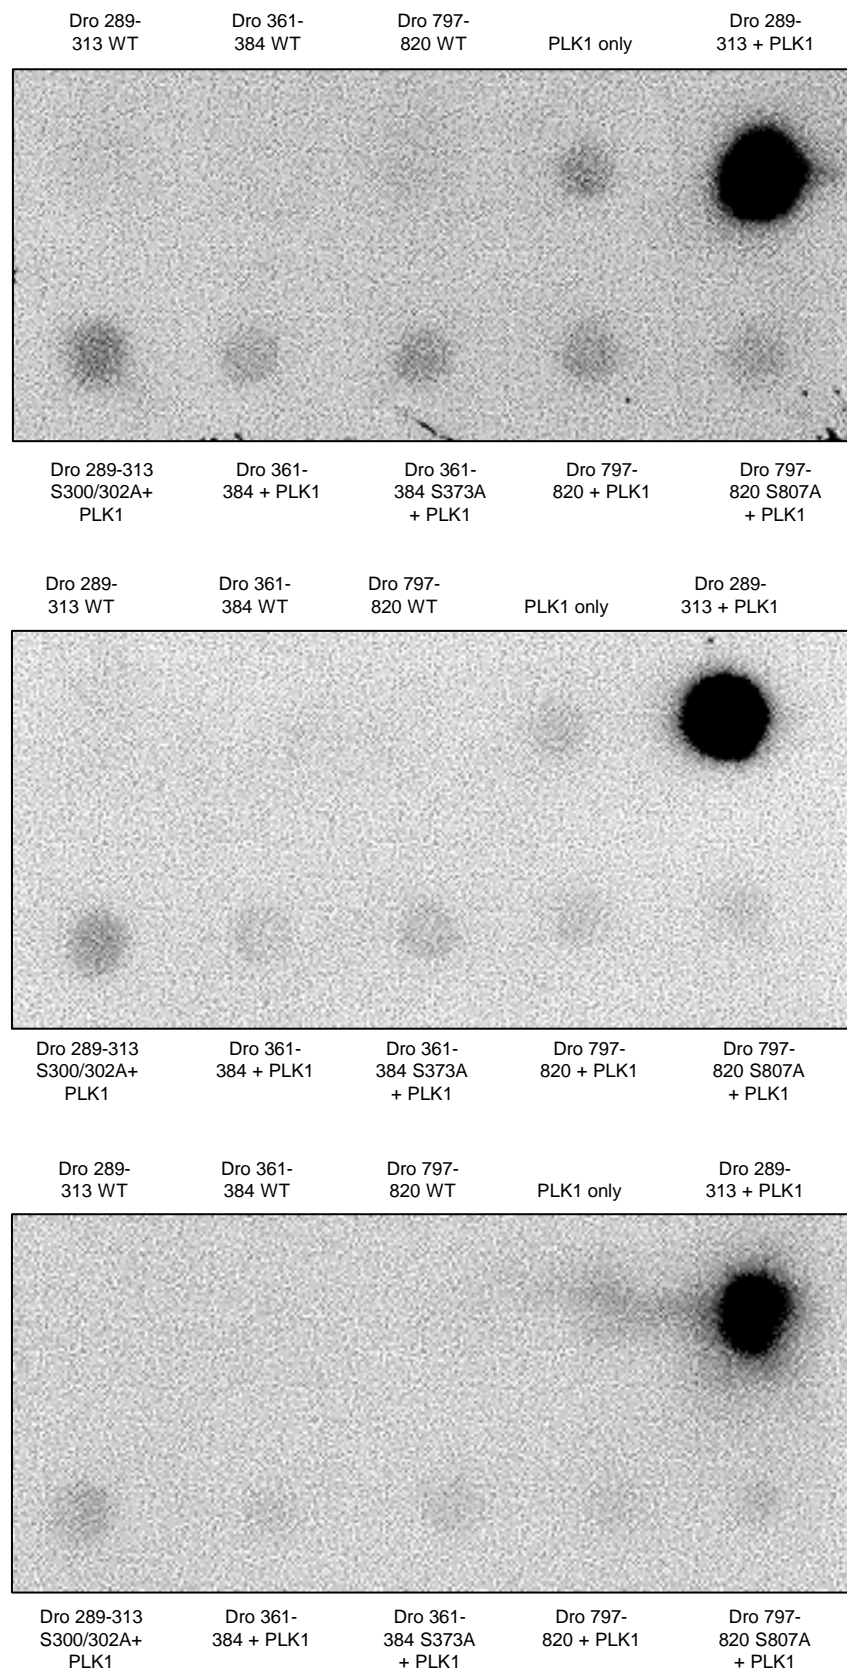

**Figure S18: PLK1 Phosphorylates Drosha at S<sup>300</sup> and/or S<sup>302</sup>.** *In vitro* kinase assay analysis of PLK1 phosphorylation of WT and phospho site-mutant Drosha peptides. Indicated Drosha peptides were incubated with recombinant PLK1 in the presence of  $\alpha$ -<sup>32</sup>P-ATP. Independent biological repeats relating to **Fig 5A** are shown.

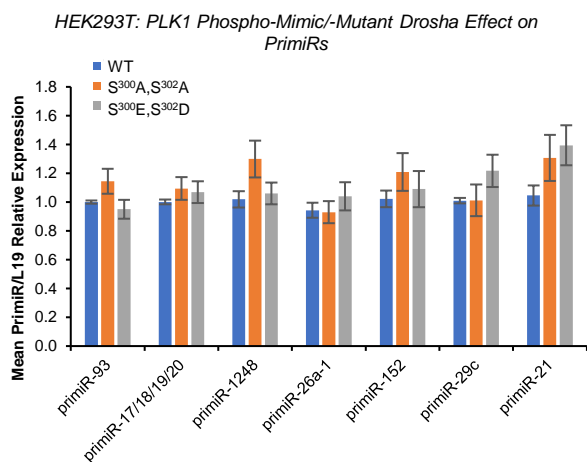

**Figure S19: PLK1 Phosphorylation of Drosha at S<sup>300</sup> and/or S<sup>302</sup> May Alter Pri-miR Levels.** qRT-PCR analysis of pri-miR levels in HEK293T cells transfected with WT, S<sup>300</sup>A,S<sup>302</sup>A or S<sup>300</sup>E,S<sup>302</sup>D Flag-Drosha for 72h. L19 was used for normalisation. *Columns:* mean pri-miR levels for three independent experiments performed in triplicate  $\pm$ SEM. Data relating to **Fig 5** are shown.

# HEK293T: Drosha 3'UTR

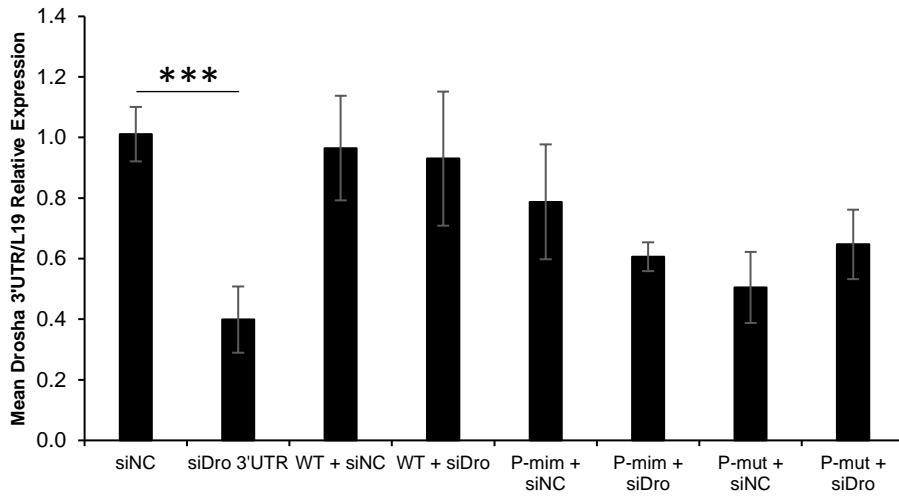

**Figure S20: siRNA Targeting Drosha 3'UTR Significantly Reduces Endogenous, but not siRNA-Resistant Exogenous, Drosha Transcript Levels.** qRT-PCR analysis of Drosha transcript levels in HEK293T cells transfected with Drosha 3'UTR siRNA  $\pm$  WT, phospho-mimic (P-mim – S300E,S302D) or phospho-mutant (P-mut – S300A,S302A) Flag-Drosha for 72h. Columns: mean relative Drosha expression normalised to L19  $\pm$  SEM for three independent experiments performed in triplicate. \*\*\*  $P \leq 0.0001$ .

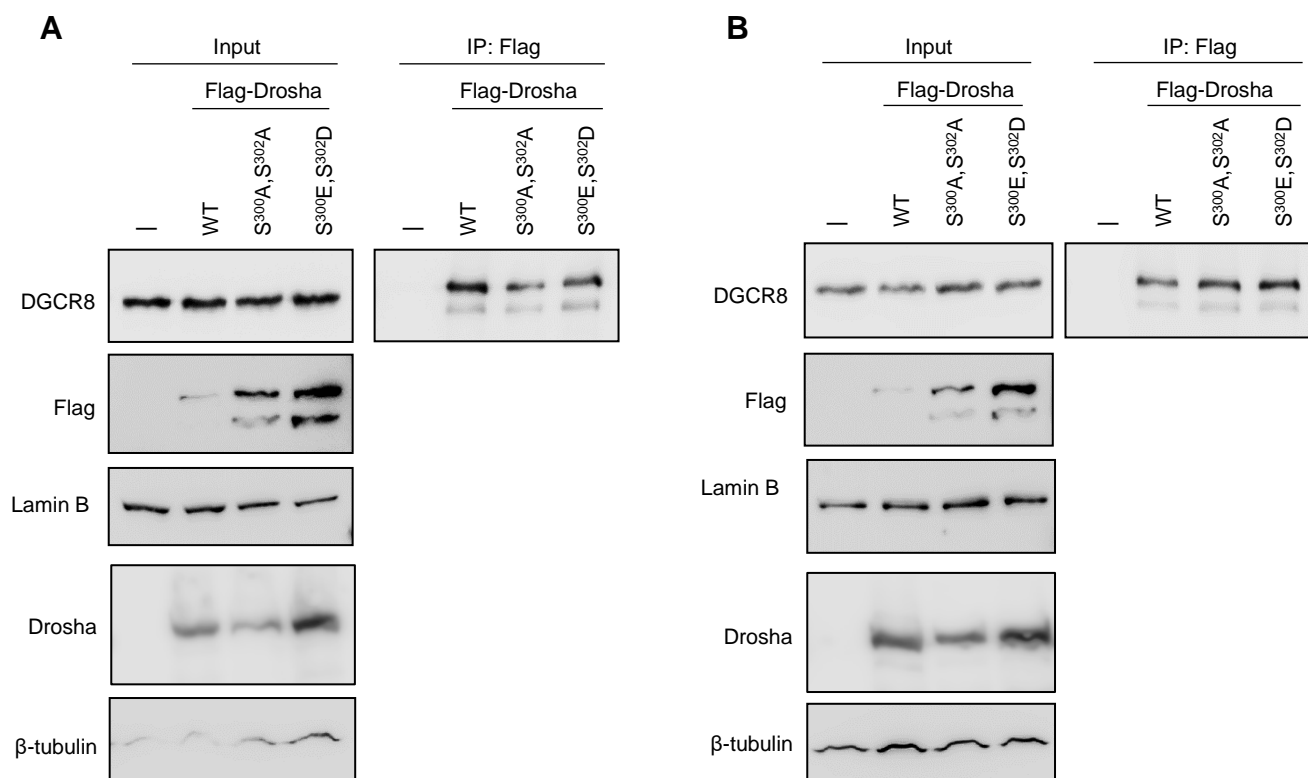

**Figure S21: PLK1 Phosphorylation of Drosha at S<sup>300</sup> and/or S<sup>302</sup> Alters Drosha:DGCR8 Interaction.** Western blot analysis of DGCR8 protein levels in Flag immunoprecipitates of HEK293T cells transfected with WT, phospho-mutant (S<sup>300</sup>A, S<sup>302</sup>A) or phospho-mimic (S<sup>300</sup>E, S<sup>302</sup>D) for 72h. Biological repeats relating to **Fig 5D** are shown. Immunoprecipitated DGCR8 was normalised to input levels of loading control-corrected Drosha (bottom panels – longer exposures in **Fig S22**).

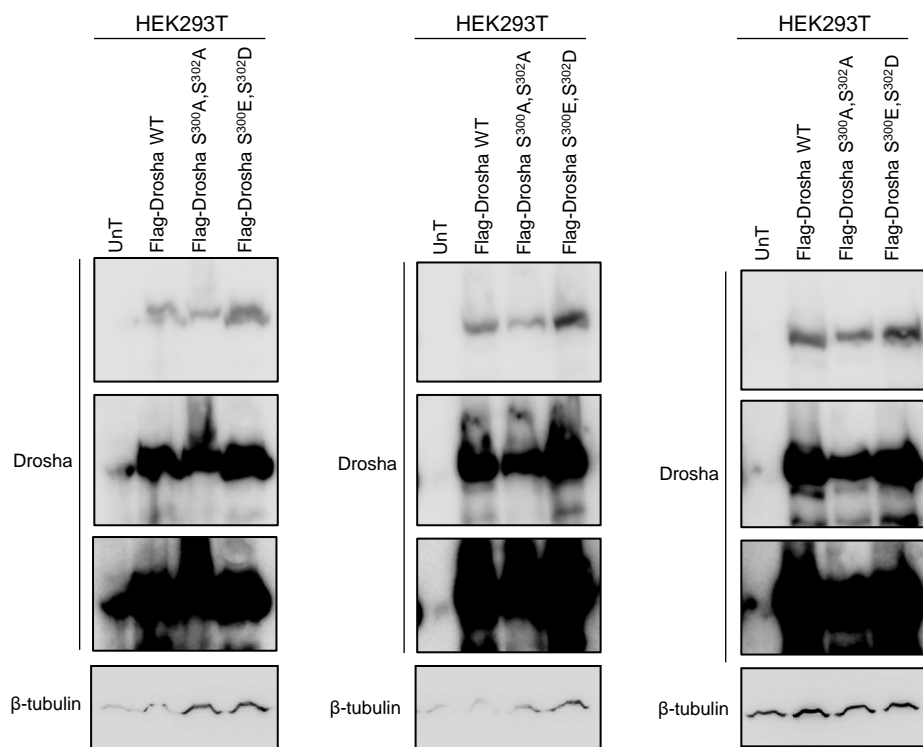

**Figure S22: Drosha Protein Levels in Lysates of HEK293T Cells Transfected with WT, Phospho-Mutant or Phospho-Mimic Drosha.** Western blot analysis of Drosha protein levels in HEK293T cells transfected with pCK-Flag-Drosha WT, S300A,S302A phospho-mutant or S300E,S302D phospho-mimic for 72h. β-tubulin was used as a control for loading and densitometry was performed using ImageJ. Longer exposures are shown to permit visualisation of endogenous Drosha. *Columns:* mean relative Drosha protein levels normalised to β-tubulin ± SEM for three independent experiments. \*  $P \leq 0.05$ .

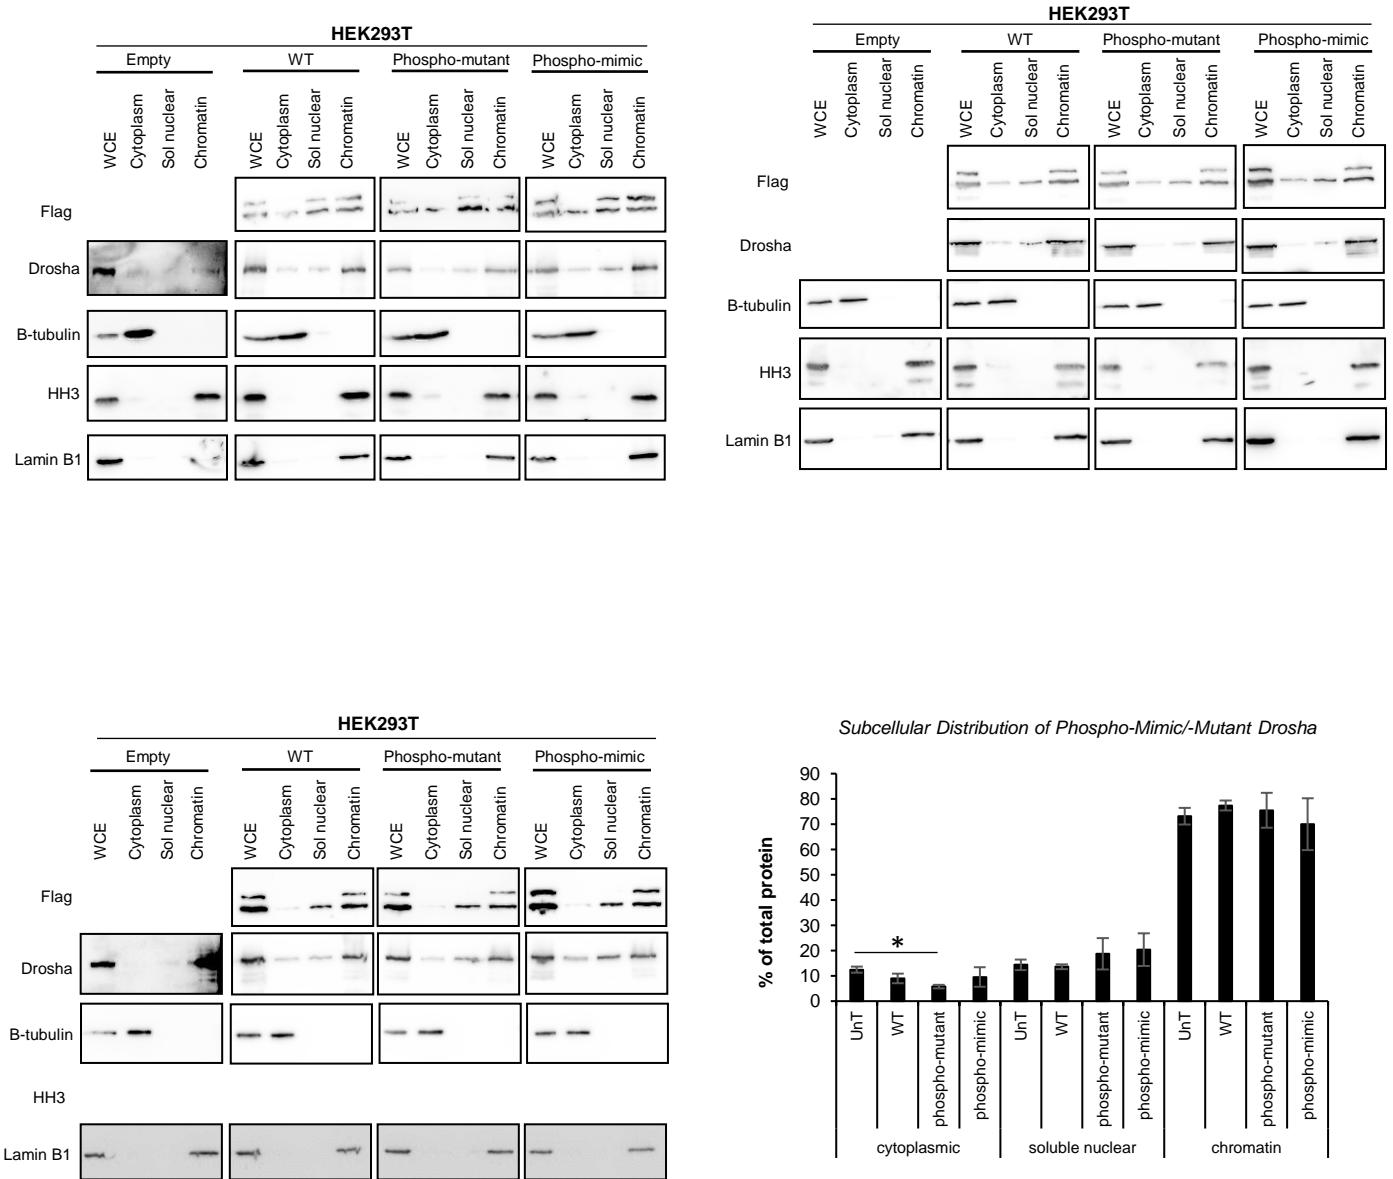

**Figure S23: Subcellular Localisation of Wild-Type, Phospho-Mutant (S<sup>300</sup>A,S<sup>302</sup>A) and Phospho-Mimic (S<sup>300</sup>E,S<sup>302</sup>D) Flag-Drosha. A-C** Western blot analysis of Flag and Drosha protein levels in whole cell extracts (WCEs), cytoplasmic and nuclear fractions of HEK293T cells transfected with WT, phospho-mutant (S<sup>300</sup>A,S<sup>302</sup>A) and phospho-mimic (S<sup>300</sup>E,S<sup>302</sup>D) Flag-Drosha for 72h.  $\beta$ -tubulin, Histone H3 and Lamin B were used as cytoplasmic and nuclear controls, respectively. **D)** Densitometry was performed using ImageJ and protein levels shown relative to WCE levels corrected for loading. *Columns:* mean  $\pm$  SEM for three independent experiments. \*  $P < 0.05$ . Data relating to **Fig 5** are shown.

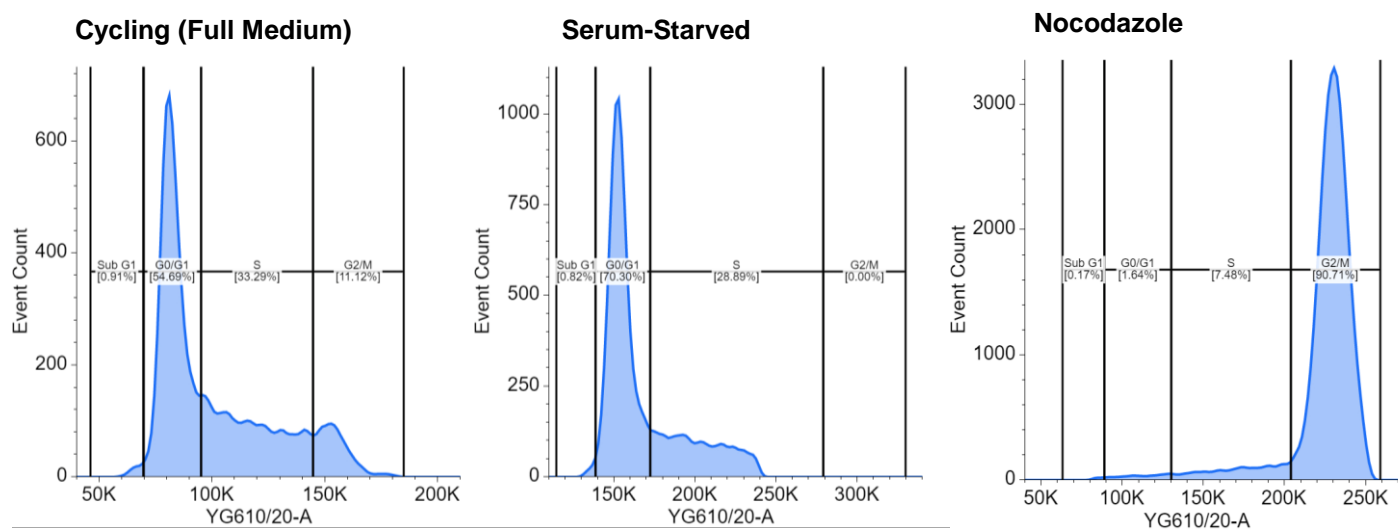

**Figure S24: PLK1 Phosphorylation of Drosha at S<sup>300</sup> and/or S<sup>302</sup> Alters Drosha:DGCR8 Interaction.** Western blot analysis of DGCR8 protein levels in Flag immunoprecipitates of HEK293T cells transfected with WT, phospho-mutant (S<sup>300</sup>A,S<sup>302</sup>A) or phospho-mimic (S<sup>300</sup>E,S<sup>302</sup>D) for 72h. Biological repeats relating to Fig 5E are shown.
