# Supplementary material for: PLK1 Regulates MicroRNA Biogenesis through Drosha Phosphorylation
Source: MDPI journal article supplement (doi:10.3390/ijms241814290), 2023-09-19
Supplement: s1 [file s1]

## Supplementary Materials

### qRT-PCR Primers

| Amplicon                       | Forward primer (5' → 3') | Reverse primer (5' → 3') |
|--------------------------------|--------------------------|--------------------------|
| Pri-miR-93                     | CACTCCATGTGTCCTAGATCC    | CTCGGGAAGTGCTAGCTCAG     |
| Pri-17/18a/19a/20a/19b-1/92a-1 | CCAGTCAGAATAATGTCAAAGTG  | CAACATCAGCAGGCCCTGC      |
| Pri-miR-1248                   | CTGTCTGATTGTTAGACATTA    | GCTGTTACTTTTCTTCTTG      |
| Pri-miR-509                    | GCTGCCATCCTCAGACATGC     | ATGCAGTACTCTACCCACAGAC   |
| Pri-miR-152                    | GCTGATAGCGCAGGTCCAGCC    | GGTCCTTCCGGGCCCAAGTTC    |
| Pri-miR-29c                    | CTCTTACACAGGCTGACCGA     | ACCACAGGCTGCTGCTGC       |
| Pri-miR-892a                   | GCAGTGCCCTTACTCAGAAAG    | GACAACTCCTGCAGCTCCA      |
| Pri-miR-21                     | GTACCACCTTGTCGGGTA       | GATGGTCAGATGAAAGATACC    |
| Pri-miR-222/221                | TGCAGTAGGCAGTTGTGTTG     | GAGAACATGTTTCCAGGTAGC    |
| Pri-miR-34a                    | CCGTGGACCGGCCAGCTGT      | TCTTCCCTCTTGGGCCCCACA    |
| Pri-miR-26a                    | AGGCCCTGGCGAAGGCCGTG     | CGGATGCCGGCGTCCAGGC      |
| Pri-miR-106b/93/25             | CAGCAGGGCAGCACAGC        | GTCCAAGACGGGAGGACAG      |
| Pri-miR-301b/130b              | CTAGACAGGCCTGGGCCTCTG    | GTCGGGCAGGCCTGCCAGT      |
| L19                            | GCGGAAGGGTACAGCCAAT      | AGCAGCCGGCGCAAA          |
| Pre-miR-93                     | CTGGGGGCTCCAAAGTGCTG     | CTCGGGAAGTGCTAGCTCAG     |
| Pre-miR-17                     | GTCAGAATAATGTCAAAGTGCTT  | GTCACCATAATGCTACAAGTG    |
| Pre-miR-1248                   | ACCTTCTTGTATAAGCACTGTG   | GCTGTTACTTTTCTTCTTG      |
| 5S rRNA                        | TACGGCCATACCACCTGA       | GGCGGTCTCCCATCCAA        |

## Supplementary Methods

### Small RNA-Sequencing and Bioinformatics Analysis

QC, small RNA sequencing and bioinformatics analysis was conducted by Novogene. RNA integrity and quantitation were assessed using the RNA Nano 600 Assay Kit on the Bioanalyser 2100 system (Agilent Technologies). 1µg total RNA per sample was used as input and sequencing libraries prepared using NEBNext® Small RNA Library Prep Set for Illumina® (NEB, USA) according to the manufacturer's instructions. Library quality was assessed sequenced using the Illumina Bioanalyser 2100 system (Agilent Technologies). Libraries were sequenced on Illumina NovaSeq 6000 platform to a minimum depth of 10 million read pairs per sample, and single-end 50bp reads generated. Clean reads were obtained from raw reads in FASTQ format through removal of adapters, poly-N sequences and low-quality reads. Clean reads were mapped to reference genome (GRCh38) using Bowtie. Mapped reads were compared to known miR sequences from miRbase. Expression of known and unique miRNAs in each sample were normalized to TPM (transcripts per million reads). Differential expression analysis was performed using DESeq2 R package. Resultant P values were False Discovery Rate (FDR)-adjusted using the Benjamini and Hochberg's approach. Gene Ontology (GO) and Kyoto Encyclopedia of Genes and Genomes (KEGG) Pathway enrichment analyses were performed using the clusterProfiler R package.
